# Supplementary material for: Rapid evolution of the human mutation spectrum
Source: eLife journal article supplement (doi:10.7554/elife.24284), 2017-04-24
Supplement: supp [file elife-24284-supp-v1.zip]

Archive with 26 entries (26 files):
- elife_poa_e24284_Figure_3_Figure_Supplement_2.pdf
- elife_poa_e24284_'Article_File'.tex
- elife_poa_e24284_Figure_4_Figure_Supplement_4.pdf
- elife_poa_e24284_Figure_1_Figure_Supplement_3.pdf
- elife_poa_e24284_Figure_3_Figure_Supplement_1.pdf
- elife_poa_e24284_Figure_1_figure_supplement_1.pdf
- elife_poa_e24284_Figure_1_Figure_Supplement_5.pdf
- elife_poa_e24284_Figure_1_Source_Data_1.txt
- elife_poa_e24284_Figure_4_Figure_Supplement_5.pdf
- elife_poa_e24284_Figure_1_Figure_Supplement_6.pdf
- elife_poa_e24284_Figure_5_Figure_Supplement_1.pdf
- elife_poa_e24284_Figure_1_Figure_Supplement_4.pdf
- elife_poa_e24284_Figure_3_Figure_Supplement_3.pdf
- elife_poa_e24284_Figure_3_Figure_Supplement_4.pdf
- elife_poa_e24284_Figure_4_Source_Data_1.txt
- elife_poa_e24284_Figure_4_Figure_Supplement_1.pdf
- elife_poa_e24284_Figure_2_Figure_Supplement_2.pdf
- elife_poa_e24284_Figure_3_Figure_Supplement_5.pdf
- elife_poa_e24284_Figure_1_Figure_Supplement_7.pdf
- elife_poa_e24284_Figure_2_Figure_Supplement_1.pdf
- elife_poa_e24284_Figure_3_Figure_Supplement_6.pdf
- elife_poa_e24284_Figure_4_Figure_Supplement_6.pdf
- elife_poa_e24284_Figure_4_Figure_Supplement_3.pdf
- elife_poa_e24284_Figure_4_Figure_Supplement_2.pdf
- elife_poa_e24284_Figure_1_Figure_Supplement_2.pdf
- elife_poa_e24284_Figure_1_Figure_Supplement_8.pdf
