# Supplementary material for: Rapid evolution of the human mutation spectrum
Source: eLife journal article supplement (doi:10.7554/elife.24284), 2017-04-24

A. PCA of human mutation spectra

PC2 (5% variance explained)

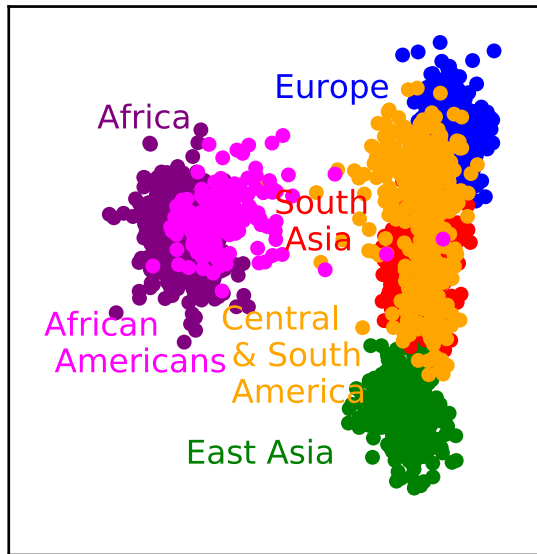

PC1 (18% variance explained)

B. PC1 Loading

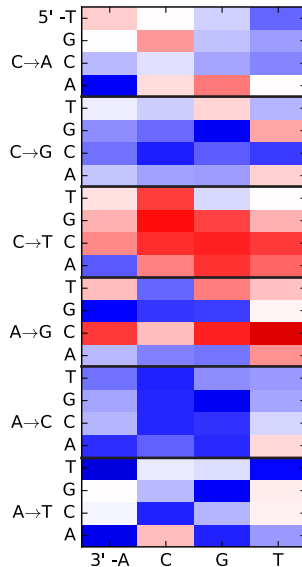

C. PC2 Loading

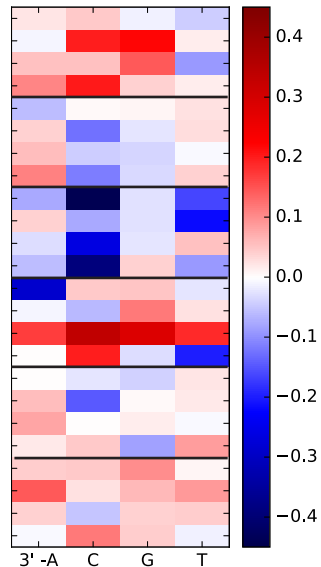

Supplement: supp [file elife-24284-supp-v1.zip › elife_poa_e24284_Figure_1_Figure_Supplement_2.pdf]
