# Supplementary material for: Rapid evolution of the human mutation spectrum
Source: eLife journal article supplement (doi:10.7554/elife.24284), 2017-04-24

1: Active Promoter

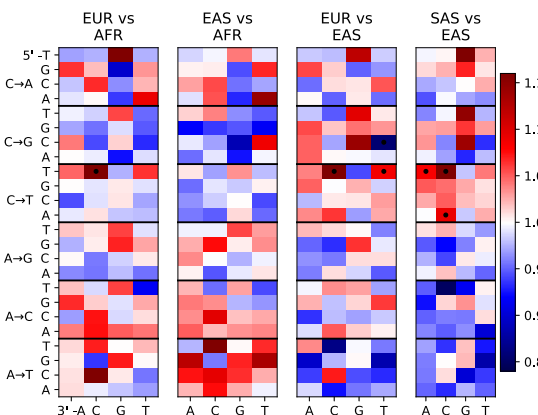

2: Weak Promoter

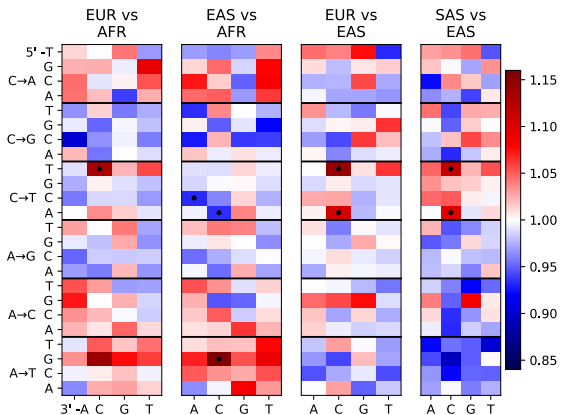

3: Poised Promoter

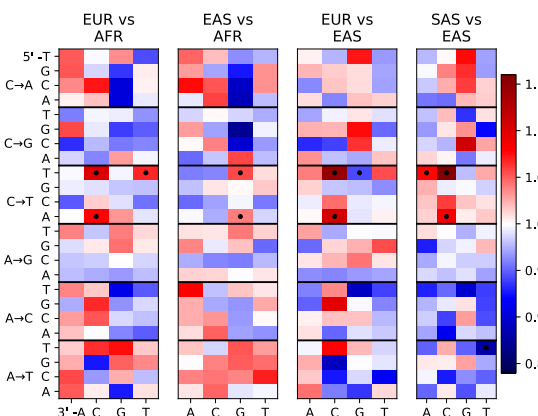

4: Strong Enhancer

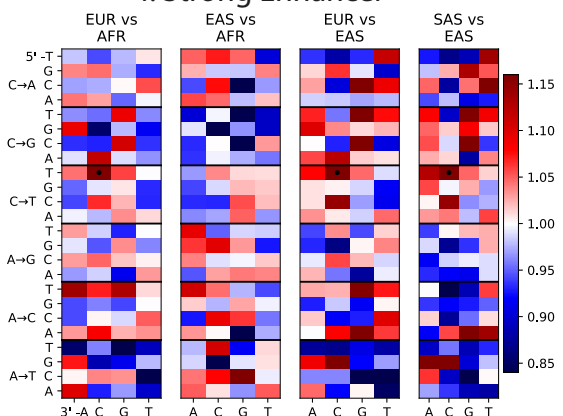

5: Strong Enhancer

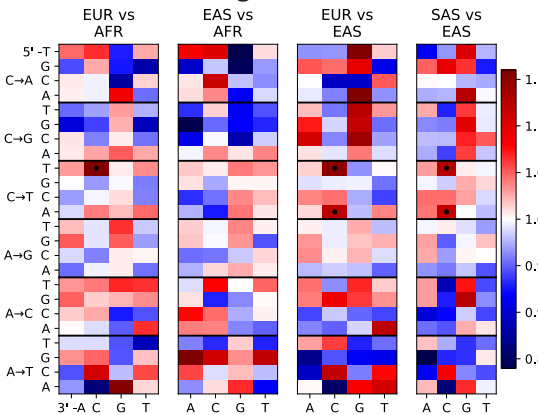

6: Weak Enhancer

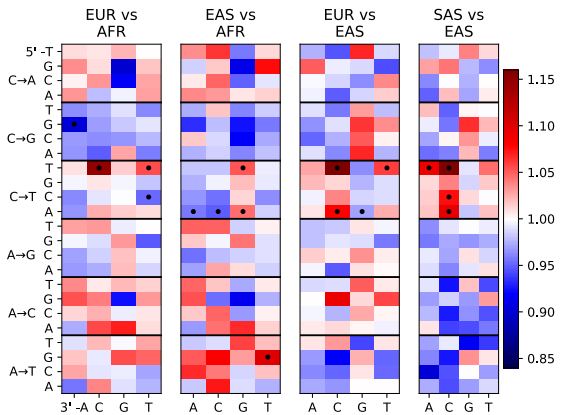

Supplement: supp [file elife-24284-supp-v1.zip › elife_poa_e24284_Figure_1_Figure_Supplement_6.pdf]
