# Supplementary material for: Rapid evolution of the human mutation spectrum
Source: eLife journal article supplement (doi:10.7554/elife.24284), 2017-04-24

## 7: Weak Enhancer

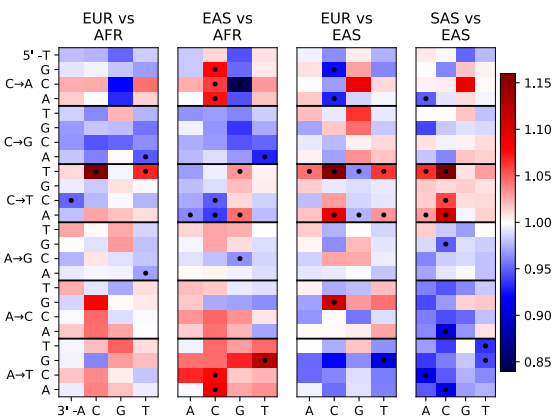

## 8: Insulator

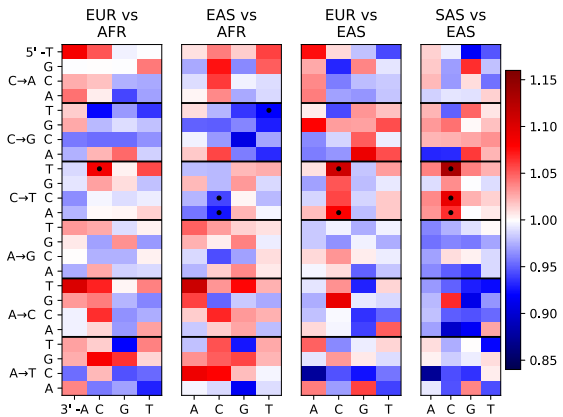

## 9: Transcription Transition

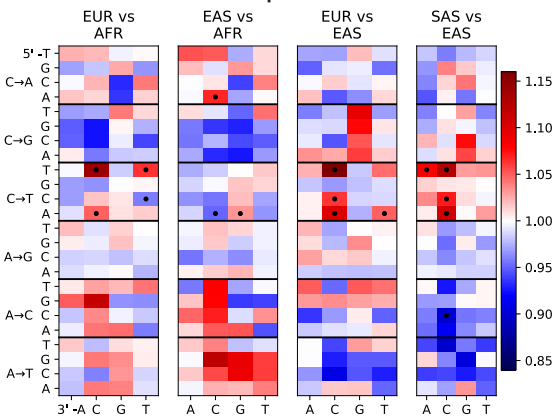

## 10: Transcription Elongation

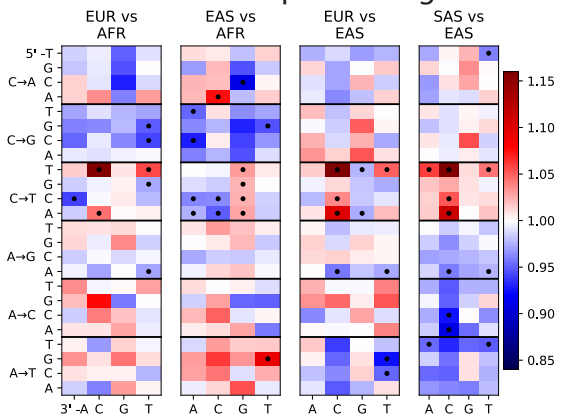

## 11: Weak Transcription

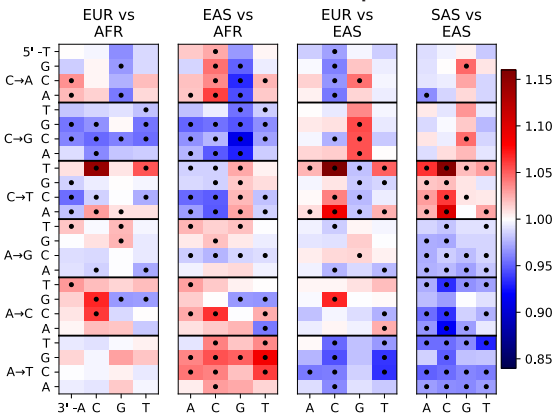

## 12: Repressed

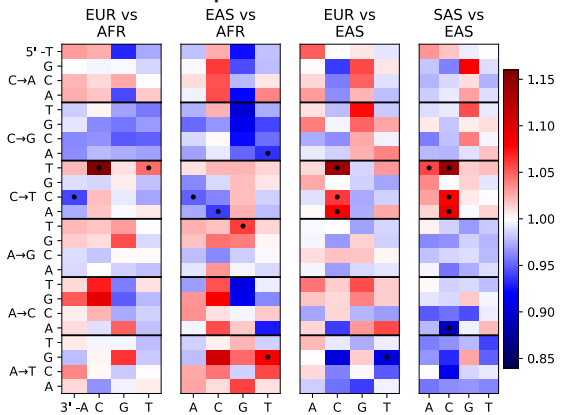

Supplement: supp [file elife-24284-supp-v1.zip › elife_poa_e24284_Figure_1_Figure_Supplement_7.pdf]
