# Supplementary material for: Rapid evolution of the human mutation spectrum
Source: eLife journal article supplement (doi:10.7554/elife.24284), 2017-04-24
Supplement: supp [file elife-24284-supp-v1.zip › elife_poa_e24284_Figure_1_Source_Data_1.txt]

Pop AAA_T AAC_T AAG_T AAT_T CAA_T CAC_T CAG_T CAT_T GAA_T GAC_T GAG_T GAT_T TAA_T TAC_T TAG_T TAT_T AAA_C AAC_C AAG_C AAT_C CAA_C CAC_C CAG_C CAT_C GAA_C GAC_C GAG_C GAT_C TAA_C TAC_C TAG_C TAT_C AAA_G AAC_G AAG_G AAT_G CAA_G CAC_G CAG_G CAT_G GAA_G GAC_G GAG_G GAT_G TAA_G TAC_G TAG_G TAT_G ACA_T ACC_T ACG_T ACT_T CCA_T CCC_T CCG_T CCT_T GCA_T GCC_T GCG_T GCT_T TCA_T TCC_T TCG_T TCT_T ACA_G ACC_G ACG_G ACT_G CCA_G CCC_G CCG_G CCT_G GCA_G GCC_G GCG_G GCT_G TCA_G TCC_G TCG_G TCT_G ACA_A ACC_A ACG_A ACT_A CCA_A CCC_A CCG_A CCT_A GCA_A GCC_A GCG_A GCT_A TCA_A TCC_A TCG_A TCT_A
AFR 93707 48245 42553 92571 40175 52773 56893 101638 41749 41443 43846 86871 105611 32123 32009 96240 162140 54301 71210 76723 87179 76232 80445 88683 57663 24331 53310 36061 70348 30519 35174 62118 273569 191702 195301 481126 195300 227596 307273 557529 151805 102863 133790 172318 208762 176136 163785 560062 448543 272407 698639 308995 300490 291248 642727 364487 240813 258435 526922 268392 260159 270538 425832 284058 114141 70937 27277 118438 76375 100685 35682 115508 57697 67657 22600 75278 98662 93896 28007 189958 137880 151476 37087 78571 87540 89779 31739 70572 112162 102433 44692 66123 87078 89285 24181 133078
AMR 67209 34394 30061 66343 28258 37747 39714 71956 29313 29556 31437 61768 76457 22508 22273 67612 116205 38731 49840 54016 62011 53854 56637 62665 40879 17493 37298 25624 50404 22002 24777 45090 194037 134993 138201 337236 138766 163506 218496 396572 108663 73162 94668 121625 149733 124903 117069 397992 312699 197267 493796 218864 206881 208317 450839 254047 169041 183990 374032 189432 183216 211589 299740 206794 80323 49902 19744 82616 53044 70606 25728 79581 39379 46965 16401 51291 68273 65185 20319 132366 96727 107448 26161 55051 60870 62825 22271 48729 76880 71049 31447 45802 59966 61952 16815 92114
EUR 55129 28161 24227 54498 22882 30853 32010 58386 23856 23886 25809 50411 63797 18351 18119 56997 94522 32342 40173 43569 50724 48282 46390 51077 33528 14617 30359 20720 40672 18142 20063 37067 157420 108826 112039 271307 114432 136124 180897 327539 88536 59424 78906 99179 122322 101536 95846 324681 254207 166437 404841 180573 166195 171183 368069 205735 137239 150349 306294 154661 150150 187174 244496 177113 65094 40121 16126 66568 42931 57682 21074 64316 31650 37798 13889 41507 55231 52888 16738 106813 81706 87925 21207 44834 49271 51673 18143 39483 62131 57705 25763 36910 48729 50277 13675 74833
EAS 51775 27370 23027 51803 21656 30155 30292 55673 22874 23570 24557 49347 59794 17616 17030 54743 89012 31733 38005 39973 47912 45475 43672 48477 31037 13942 28234 19173 38301 17855 18941 34644 147186 103398 105425 256075 106665 127017 168612 305129 83604 56044 72966 92937 113284 96243 89015 303227 233650 138326 383508 161280 154260 150474 347760 191852 126502 136524 289309 144430 134397 140951 230227 153365 60392 37765 14927 61933 40424 54953 19178 60491 29909 35452 12470 39088 51502 49544 15375 99483 77208 84206 19871 41931 46454 49258 16880 37471 58150 55150 23807 34396 45919 47867 12795 70366
SAS 61225 32022 27280 61016 25578 34462 35983 66378 27297 27647 29386 58517 69278 20798 20238 62140 105522 34225 45049 48104 56536 51201 51778 57585 37393 15805 34183 23133 45556 19682 22320 41224 175406 122561 125663 305869 126276 149644 200080 362598 98857 66687 87828 111364 137158 114468 107466 364407 287020 181954 463174 201615 189160 191005 421970 232993 155124 168487 350652 175123 169162 197596 280301 193055 72633 45057 18018 74864 48527 65549 23810 72901 35349 42242 15151 46558 62445 59679 18723 120288 89729 101096 24193 50433 56041 59507 20347 45329 70216 66350 28908 41847 55780 57894 15487 84566
