# Supplementary material for: Rapid evolution of the human mutation spectrum
Source: eLife journal article supplement (doi:10.7554/elife.24284), 2017-04-24

C. CpG transversions

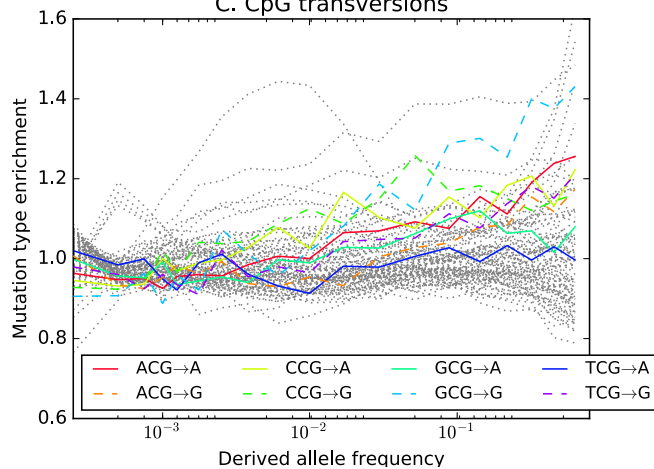

D. C→A transversions (non-CpG)

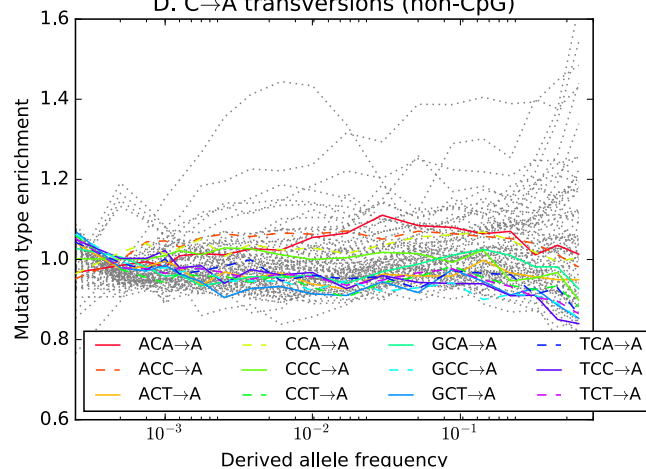

D. C→G transversions (non-CpG)

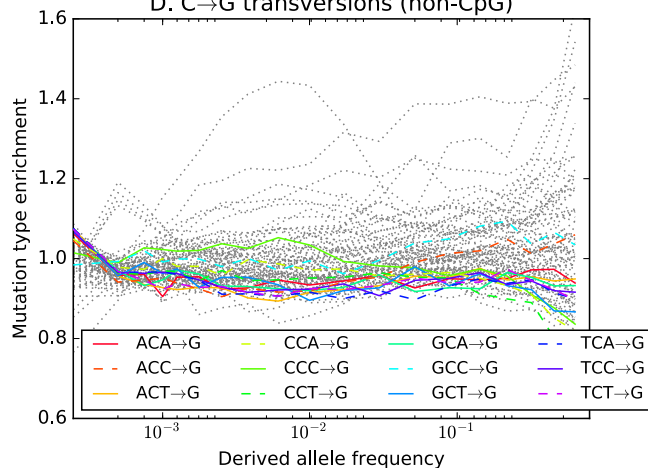

F. CpA→CpG transitions

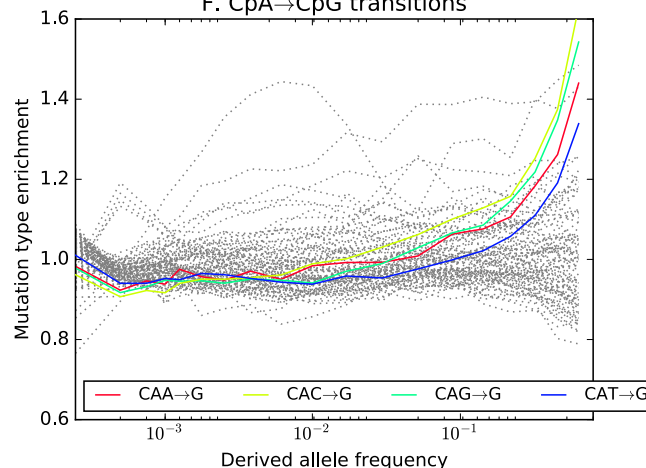

G. A→G transitions (non-CpG)

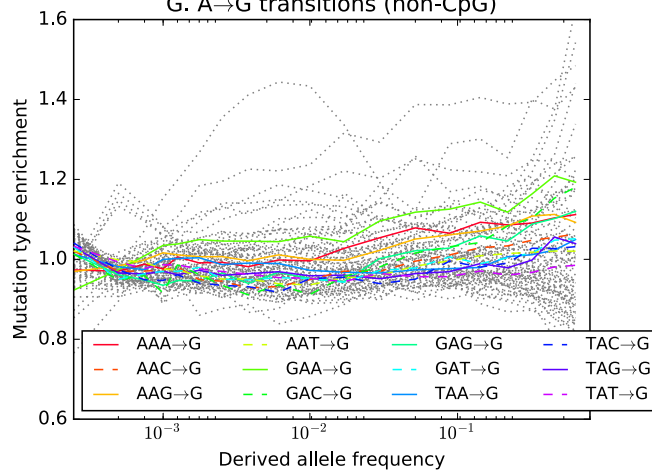

Supplement: supp [file elife-24284-supp-v1.zip › elife_poa_e24284_Figure_3_Figure_Supplement_4.pdf]
