# Supplementary material for: Rapid evolution of the human mutation spectrum
Source: eLife journal article supplement (doi:10.7554/elife.24284), 2017-04-24

H. A→C transversions (3' GC base)

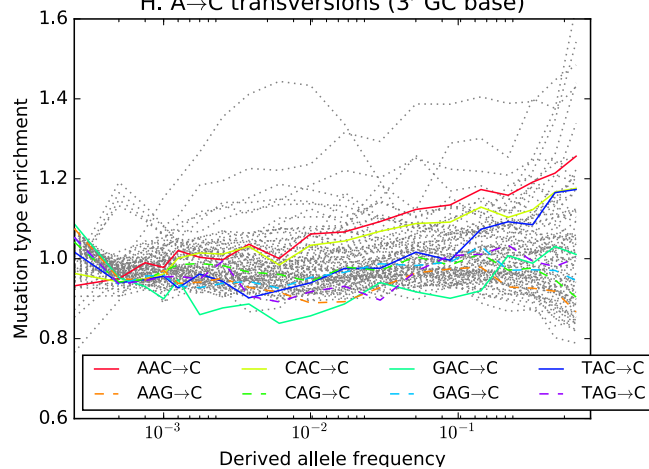

I. A→C transversions (3' AT base)

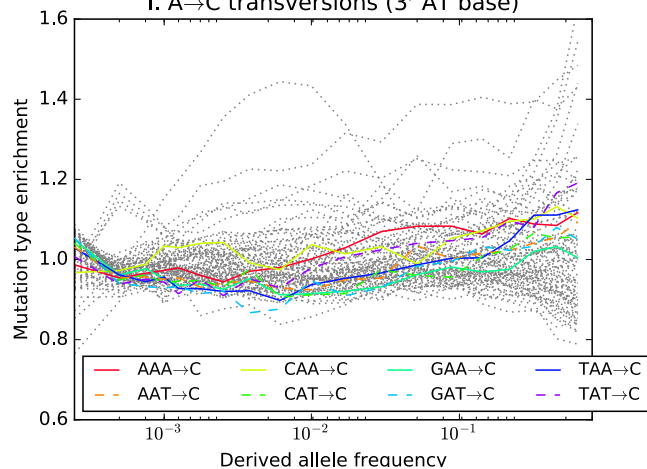

J. A→T transversions (3' GC base)

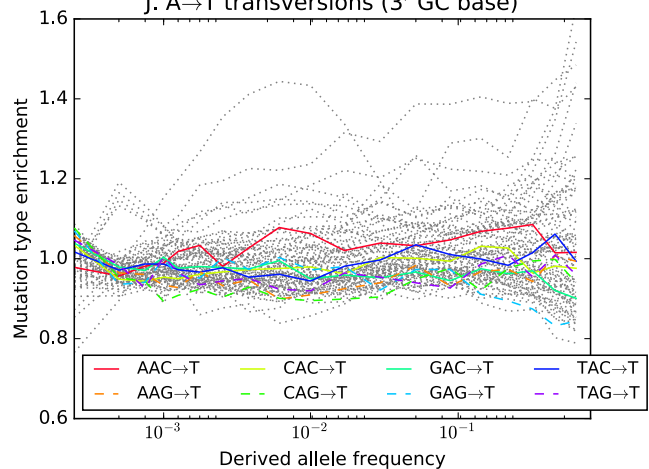

K. A→T transversions (3' AT base)

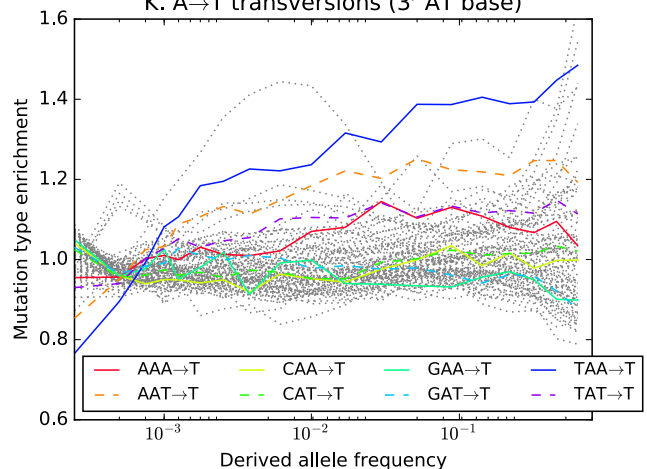

Supplement: supp [file elife-24284-supp-v1.zip › elife_poa_e24284_Figure_3_Figure_Supplement_5.pdf]
