# Supplementary material for: Rapid evolution of the human mutation spectrum
Source: eLife journal article supplement (doi:10.7554/elife.24284), 2017-04-24

# A. South Asian Mutation PCA

PC2 (2% variance explained)

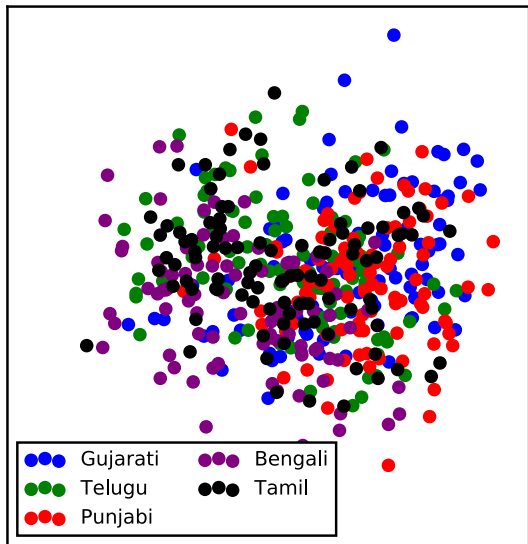

PC1 (2% variance explained)

# B. PC1 Loading

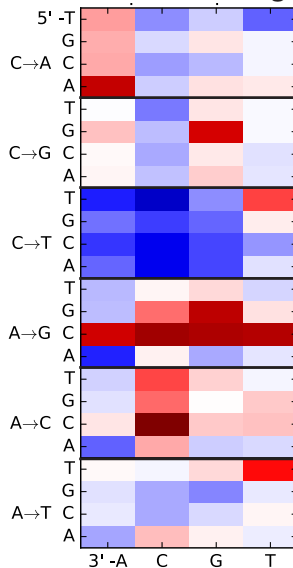

# C. PC2 Loading

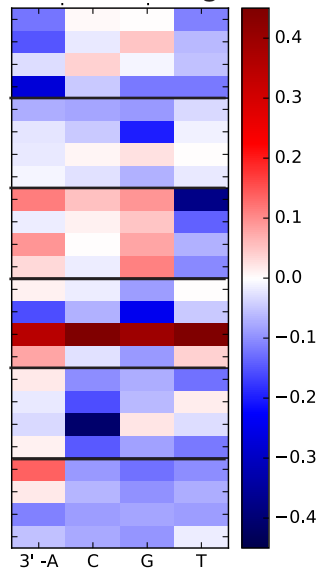

Supplement: supp [file elife-24284-supp-v1.zip › elife_poa_e24284_Figure_4_Figure_Supplement_5.pdf]
