# Supplementary figures and images for: Rapid evolution of the human mutation spectrum
Source: eLife journal article supplement (doi:10.7554/elife.24284), 2017-04-24

## Replicating the TCC mutation pulse in ExAC

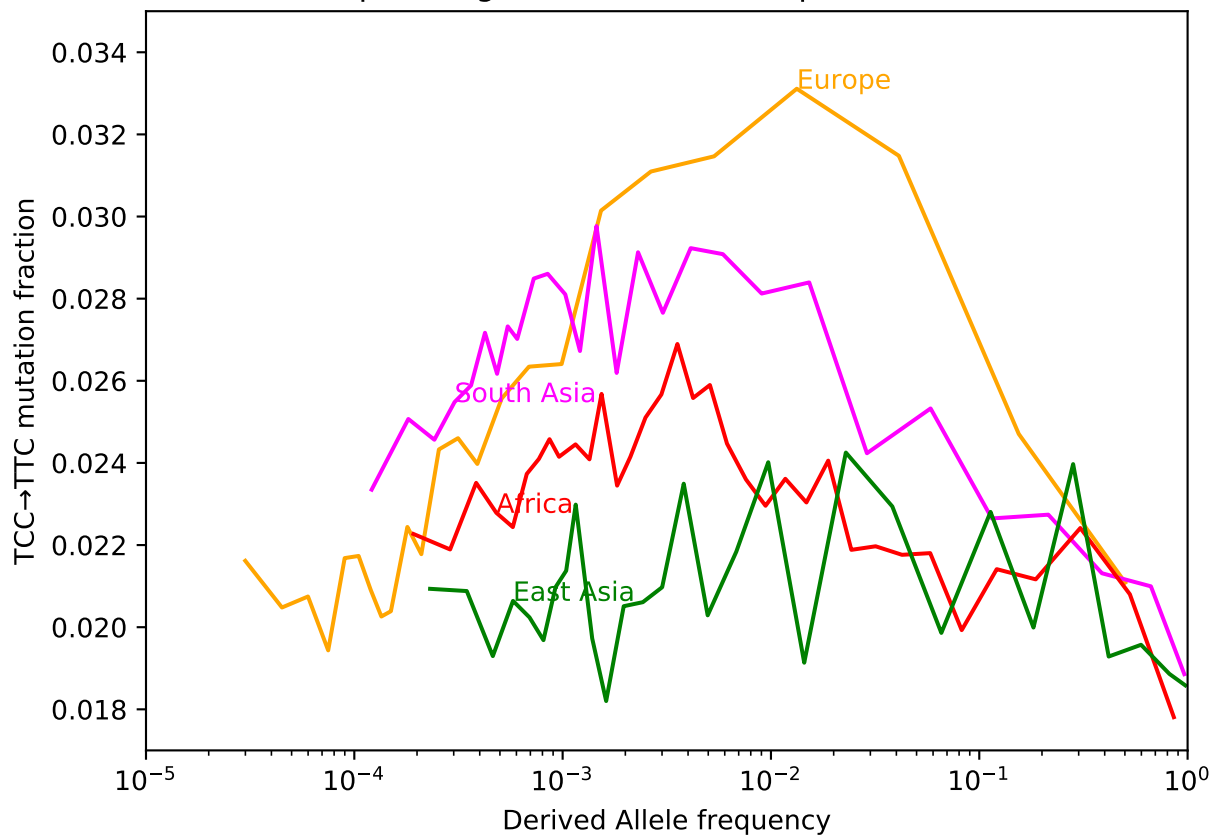

Supplement: supp [file elife-24284-supp-v1.zip › elife_poa_e24284_Figure_3_Figure_Supplement_2.pdf]

### A. Europe vs Africa

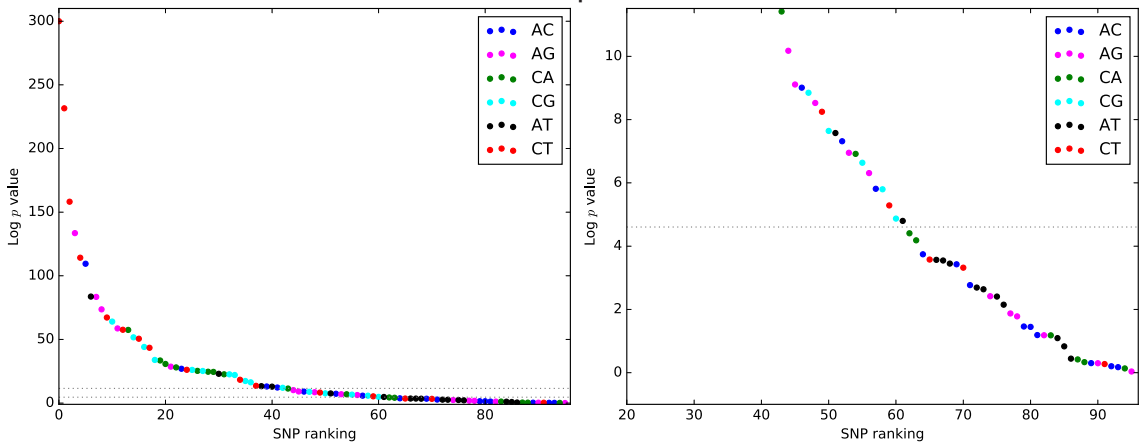

### B. Europe vs East Asia

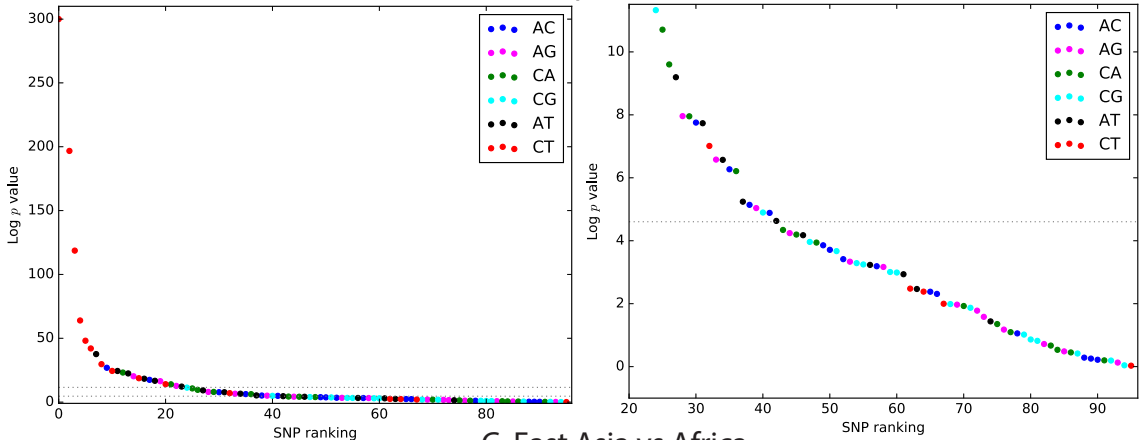

### C. East Asia vs Africa

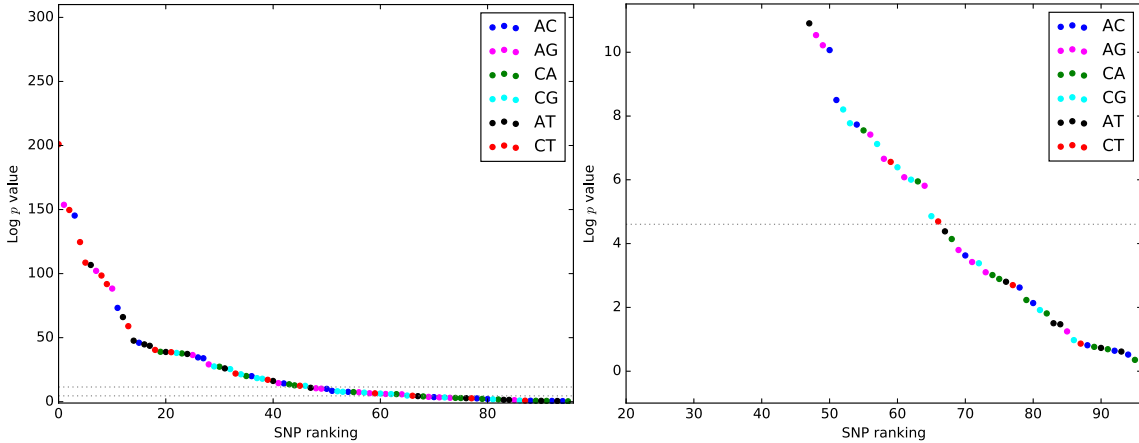

### D. South Asia vs East Asia

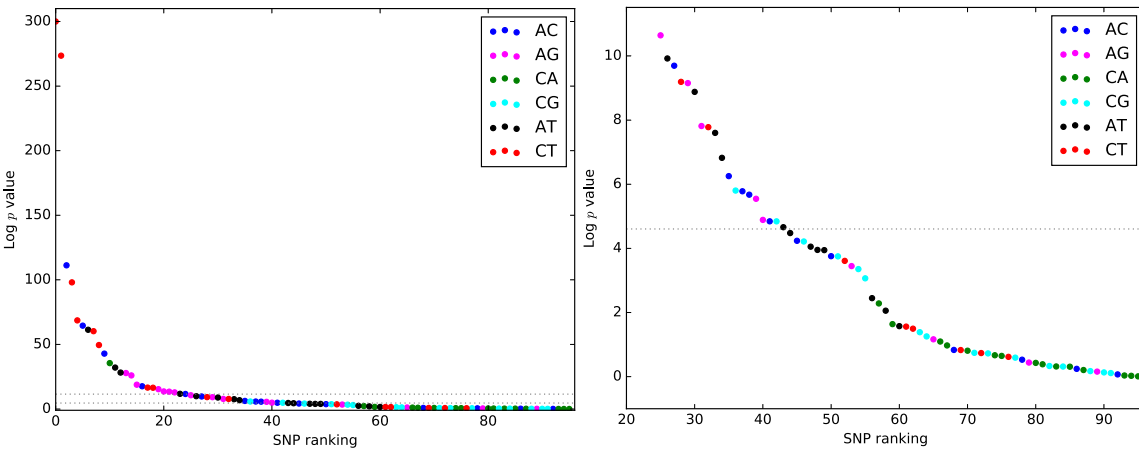

Supplement: supp [file elife-24284-supp-v1.zip › elife_poa_e24284_Figure_1_Figure_Supplement_3.pdf]

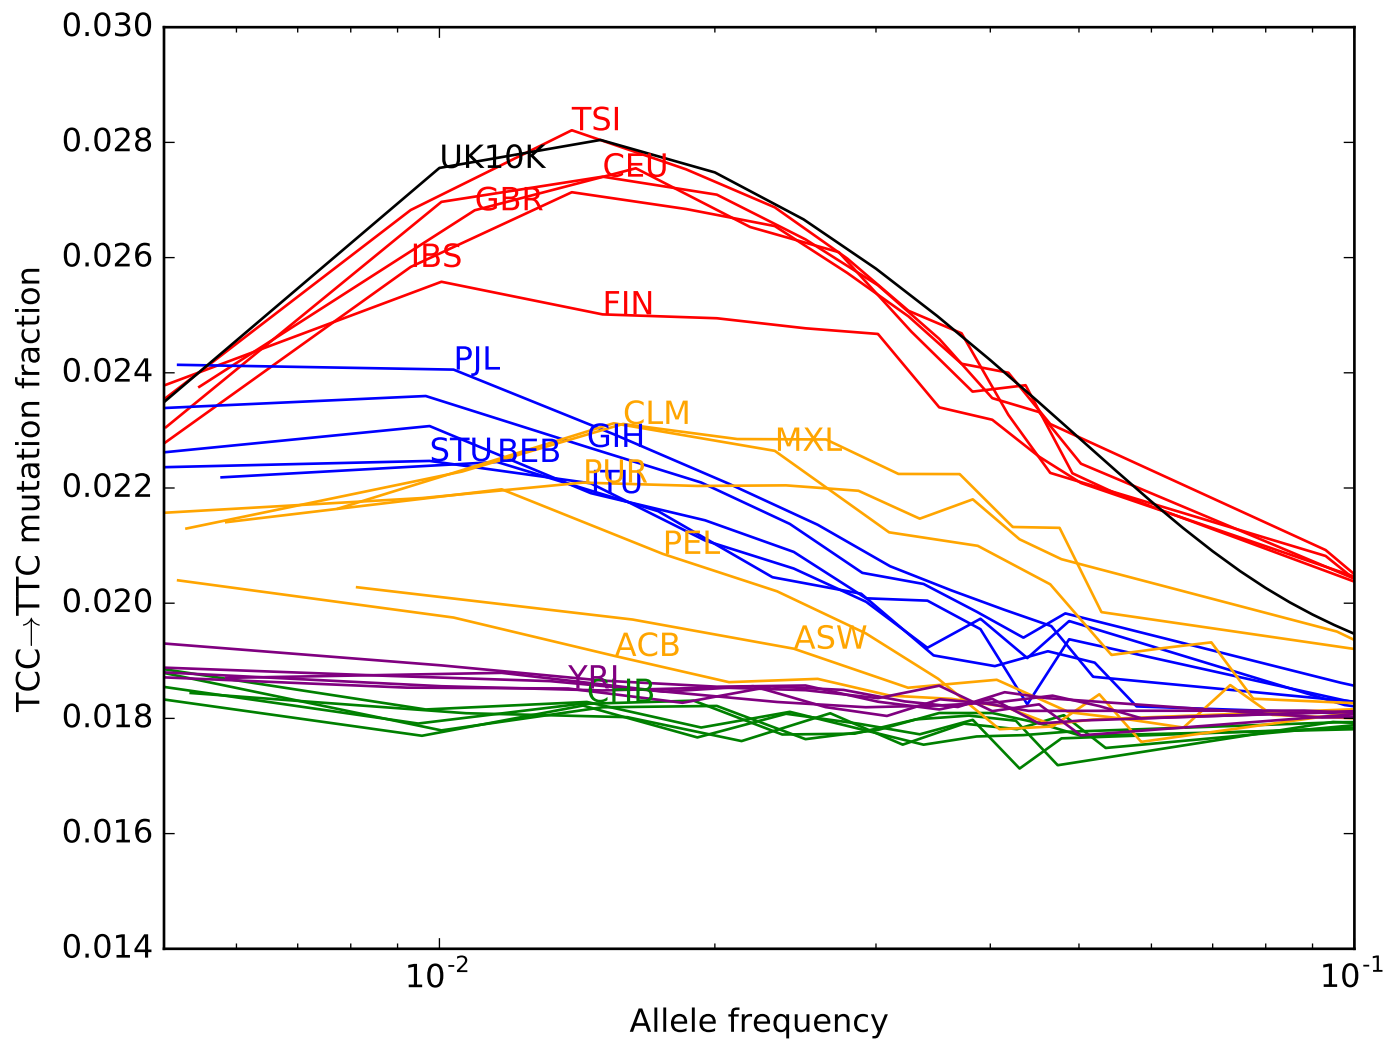

Supplement: supp [file elife-24284-supp-v1.zip › elife_poa_e24284_Figure_3_Figure_Supplement_1.pdf]

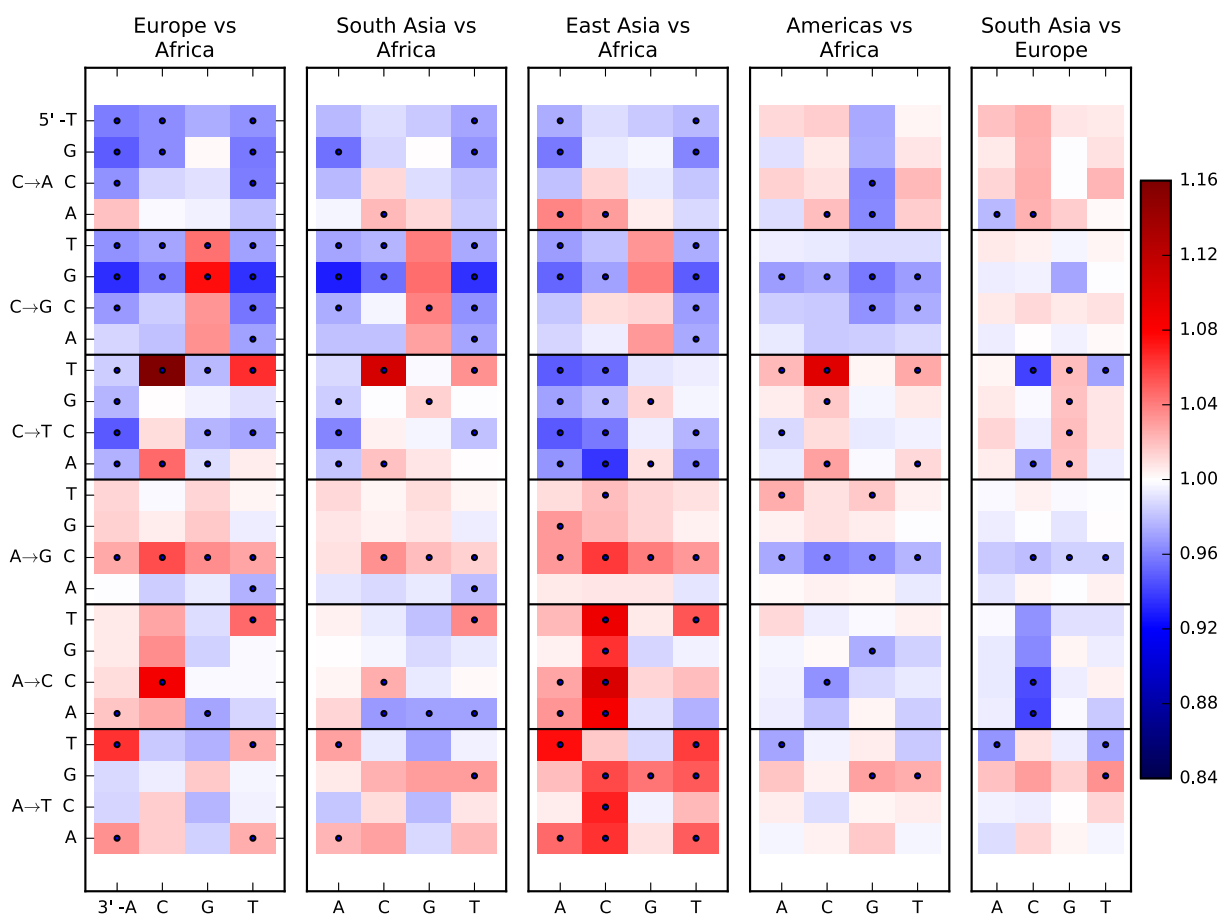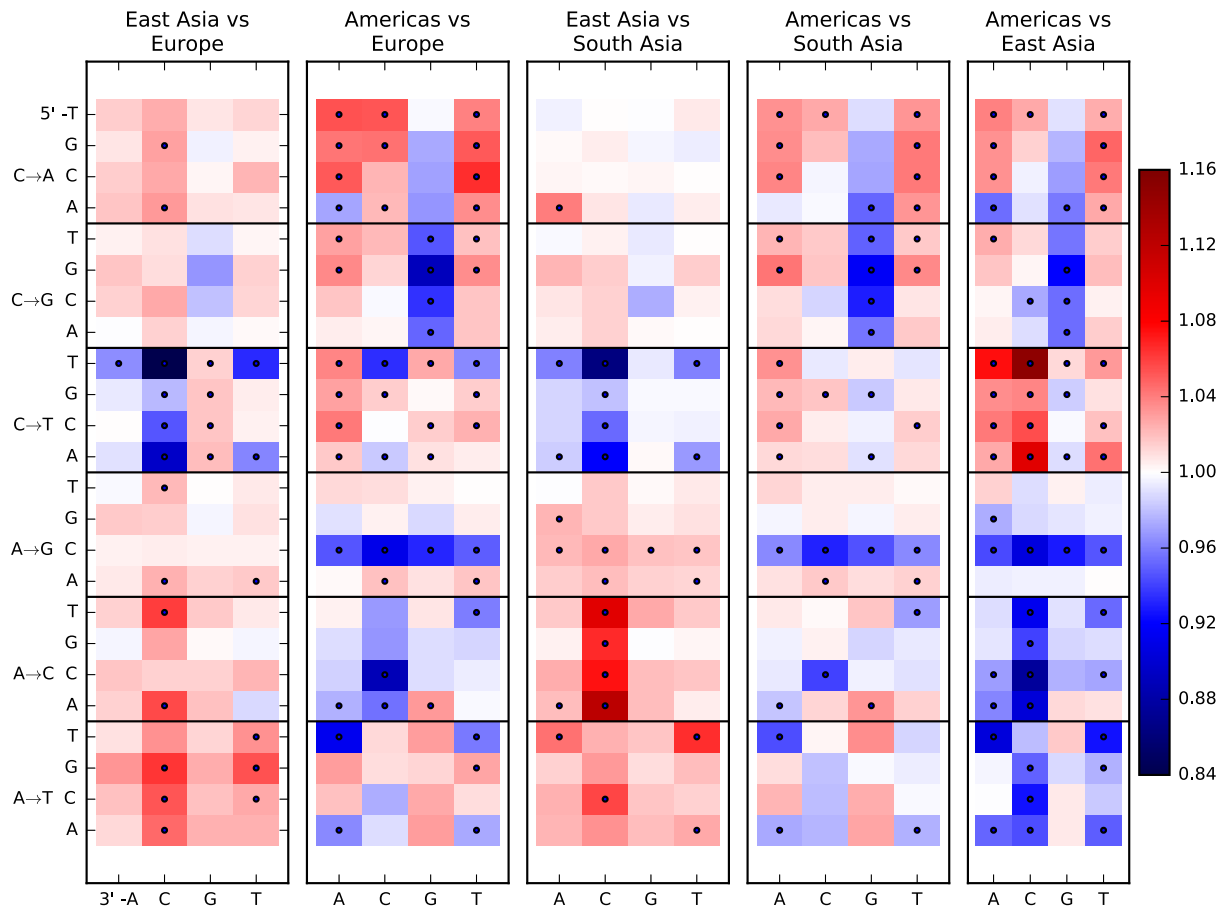

Supplement: supp [file elife-24284-supp-v1.zip › elife_poa_e24284_Figure_1_figure_supplement_1.pdf]

A. (+)-Transcribed DNA

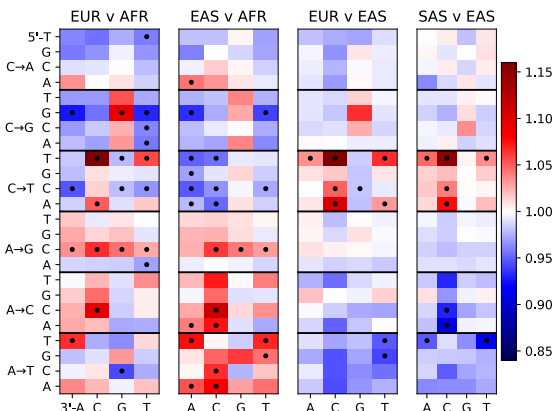

B. (-)-Transcribed DNA

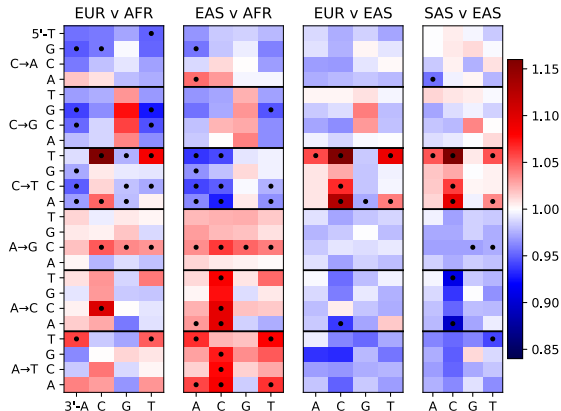

C. Nontranscribed DNA

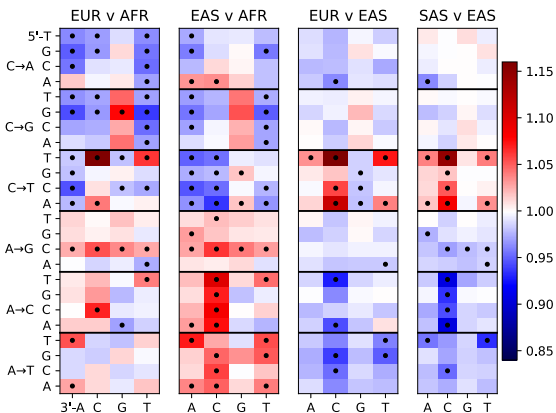

D. Strand Bias Residuals

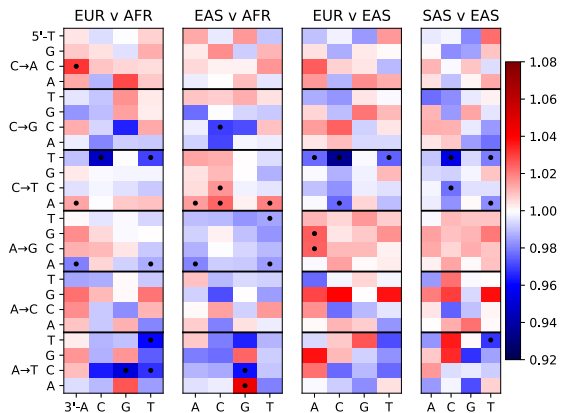

Supplement: supp [file elife-24284-supp-v1.zip › elife_poa_e24284_Figure_1_Figure_Supplement_5.pdf]

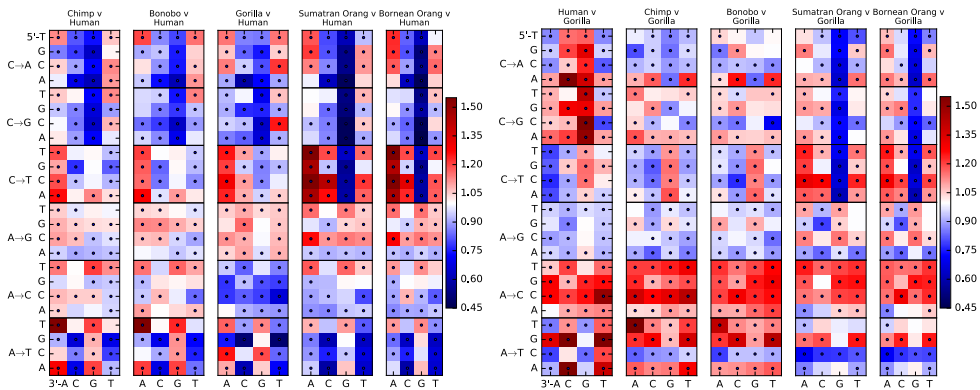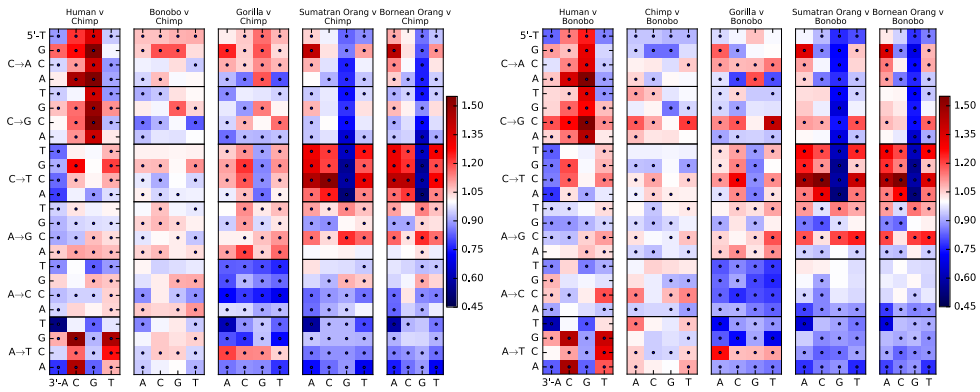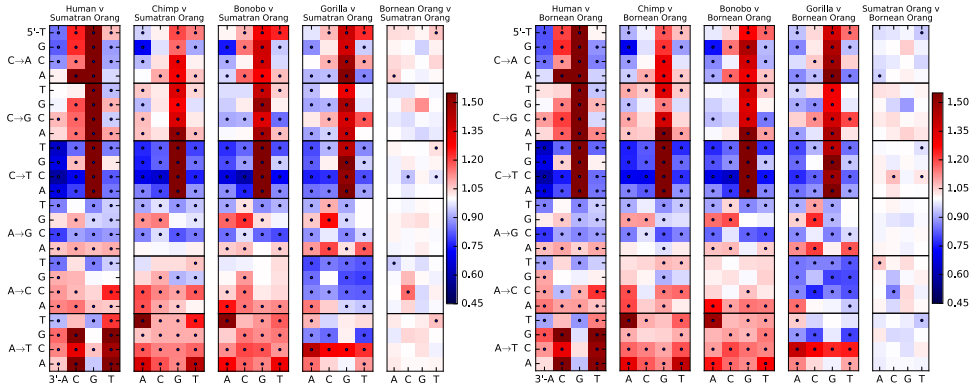

Supplement: supp [file elife-24284-supp-v1.zip › elife_poa_e24284_Figure_5_Figure_Supplement_1.pdf]

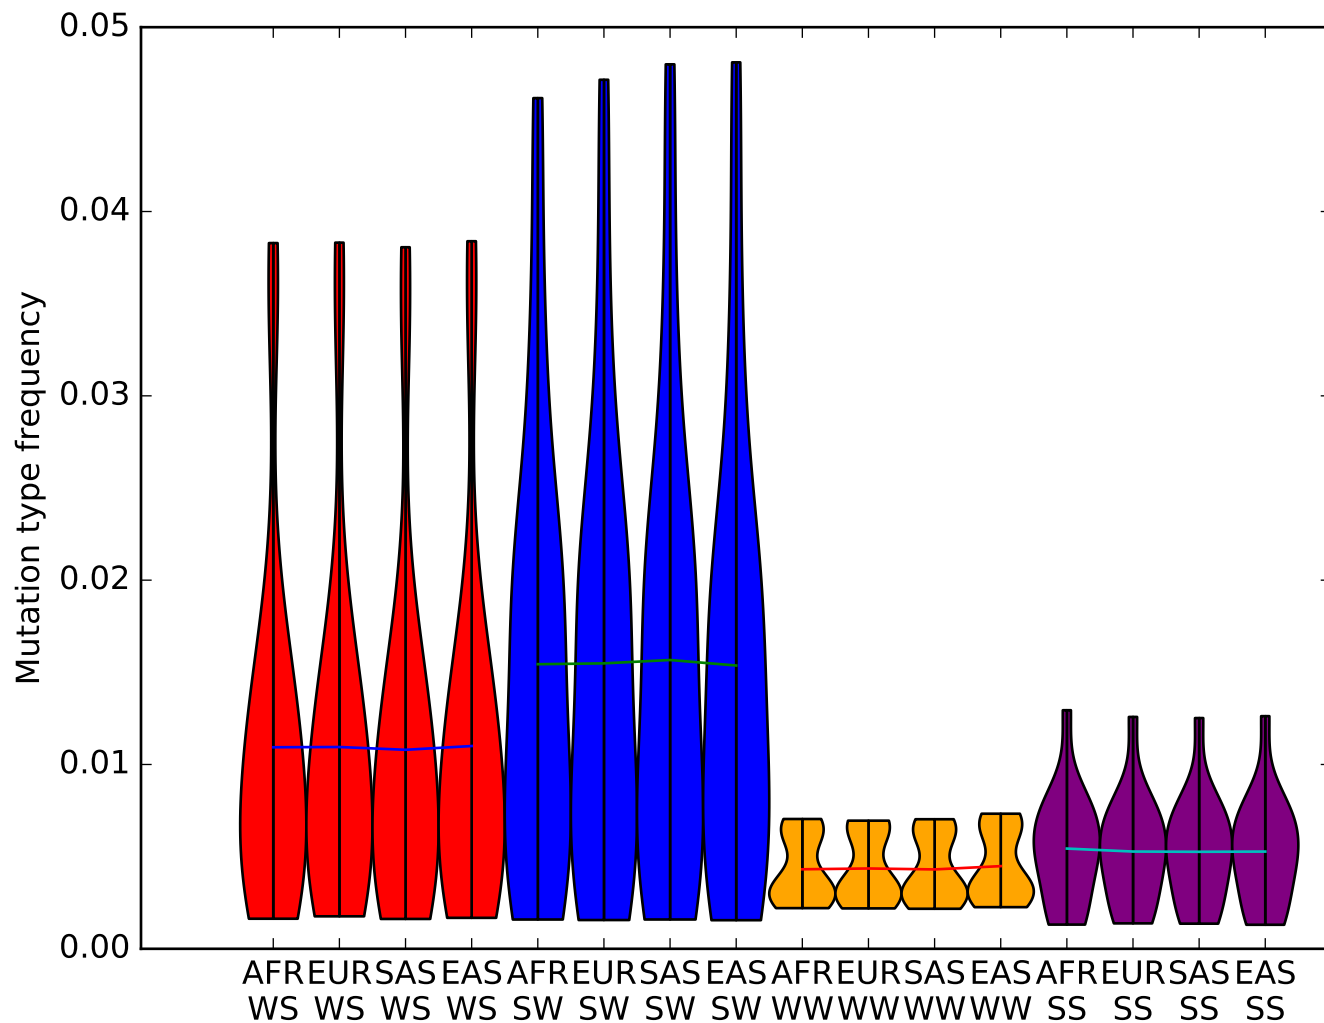

Supplement: supp [file elife-24284-supp-v1.zip › elife_poa_e24284_Figure_1_Figure_Supplement_4.pdf]

A. C→T transitions (non-CpG)

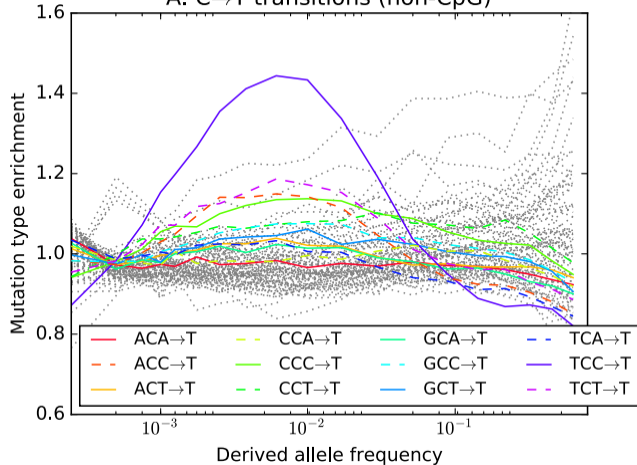

B. CpG transitions

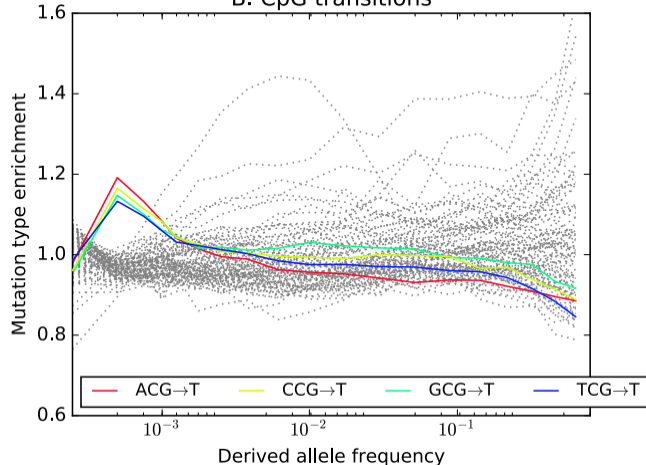

Supplement: supp [file elife-24284-supp-v1.zip › elife_poa_e24284_Figure_3_Figure_Supplement_3.pdf]

# A. West Eurasia vs South Asia

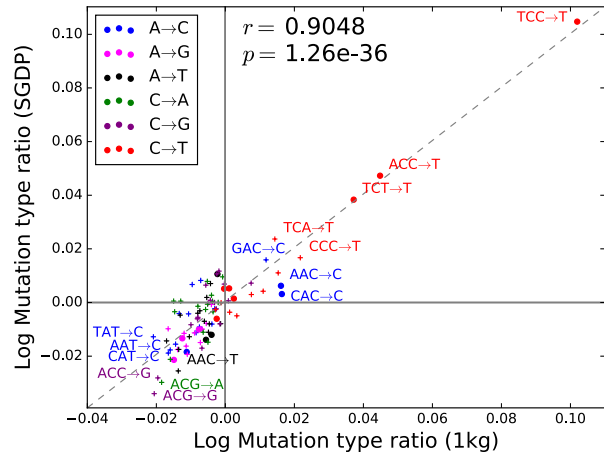

# B. South Asia vs Africa

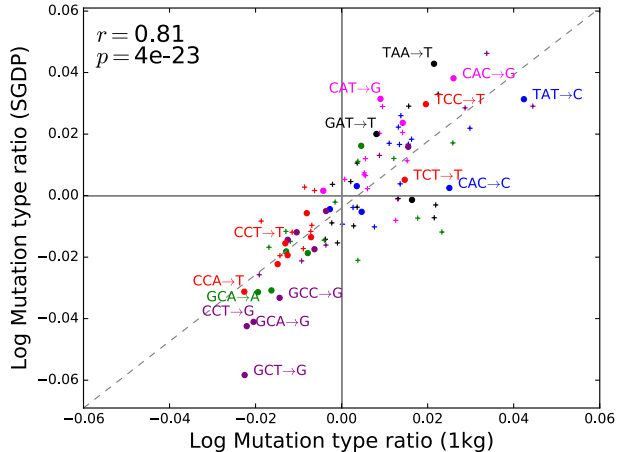

Supplement: supp [file elife-24284-supp-v1.zip › elife_poa_e24284_Figure_2_Figure_Supplement_2.pdf]

# A. Simons Genomic Diversity Panel (SGDP)

# B. 1000 Genomes Phase 3 Panel (1000G)

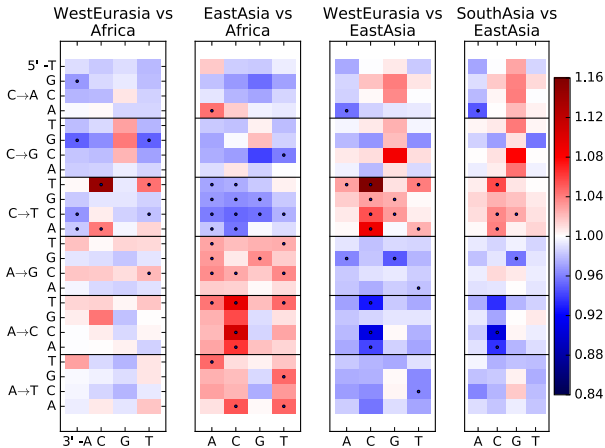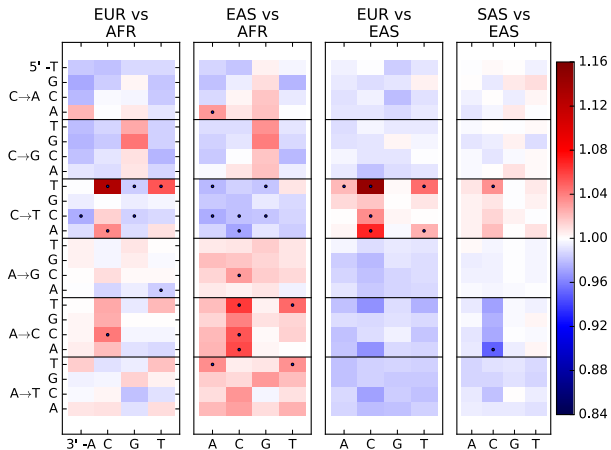

Supplement: supp [file elife-24284-supp-v1.zip › elife_poa_e24284_Figure_2_Figure_Supplement_1.pdf]

### A. Europe vs Africa

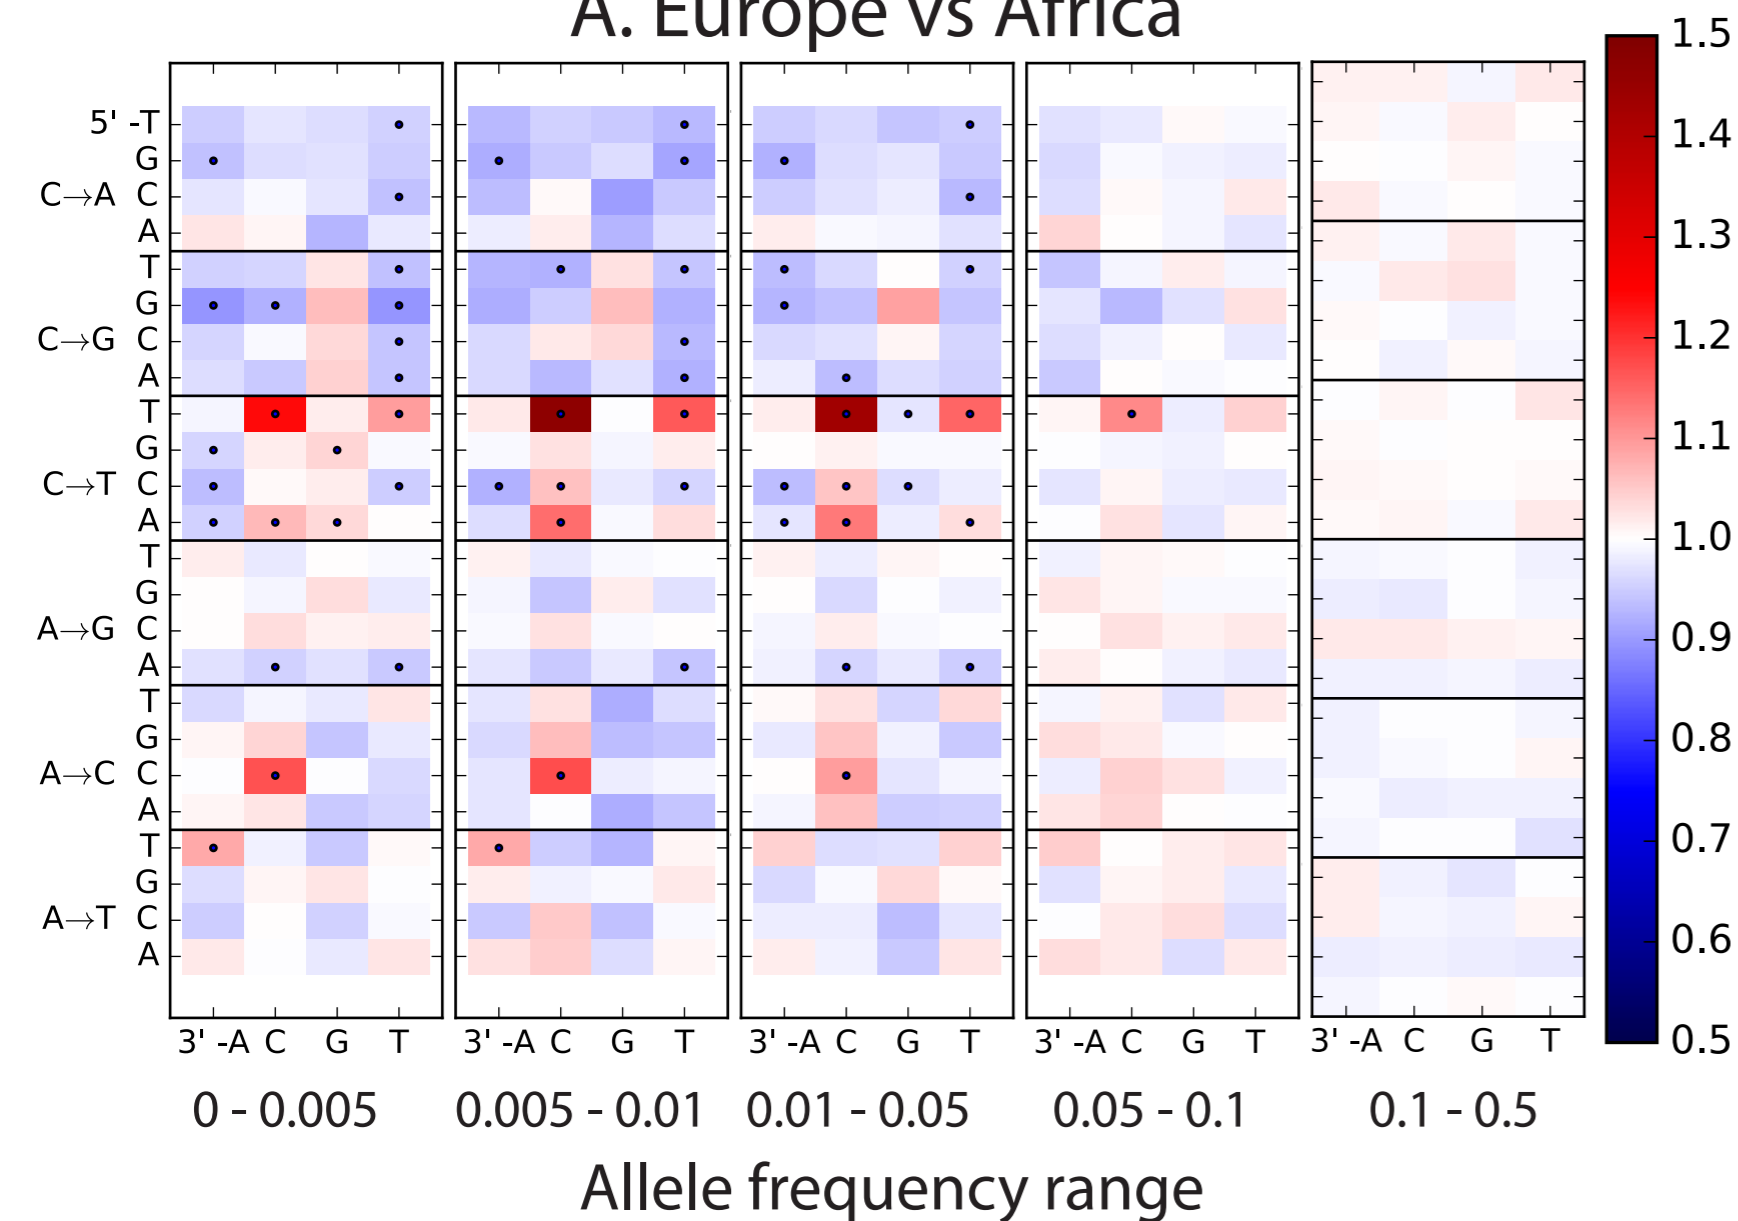

### B. East Asia vs Africa

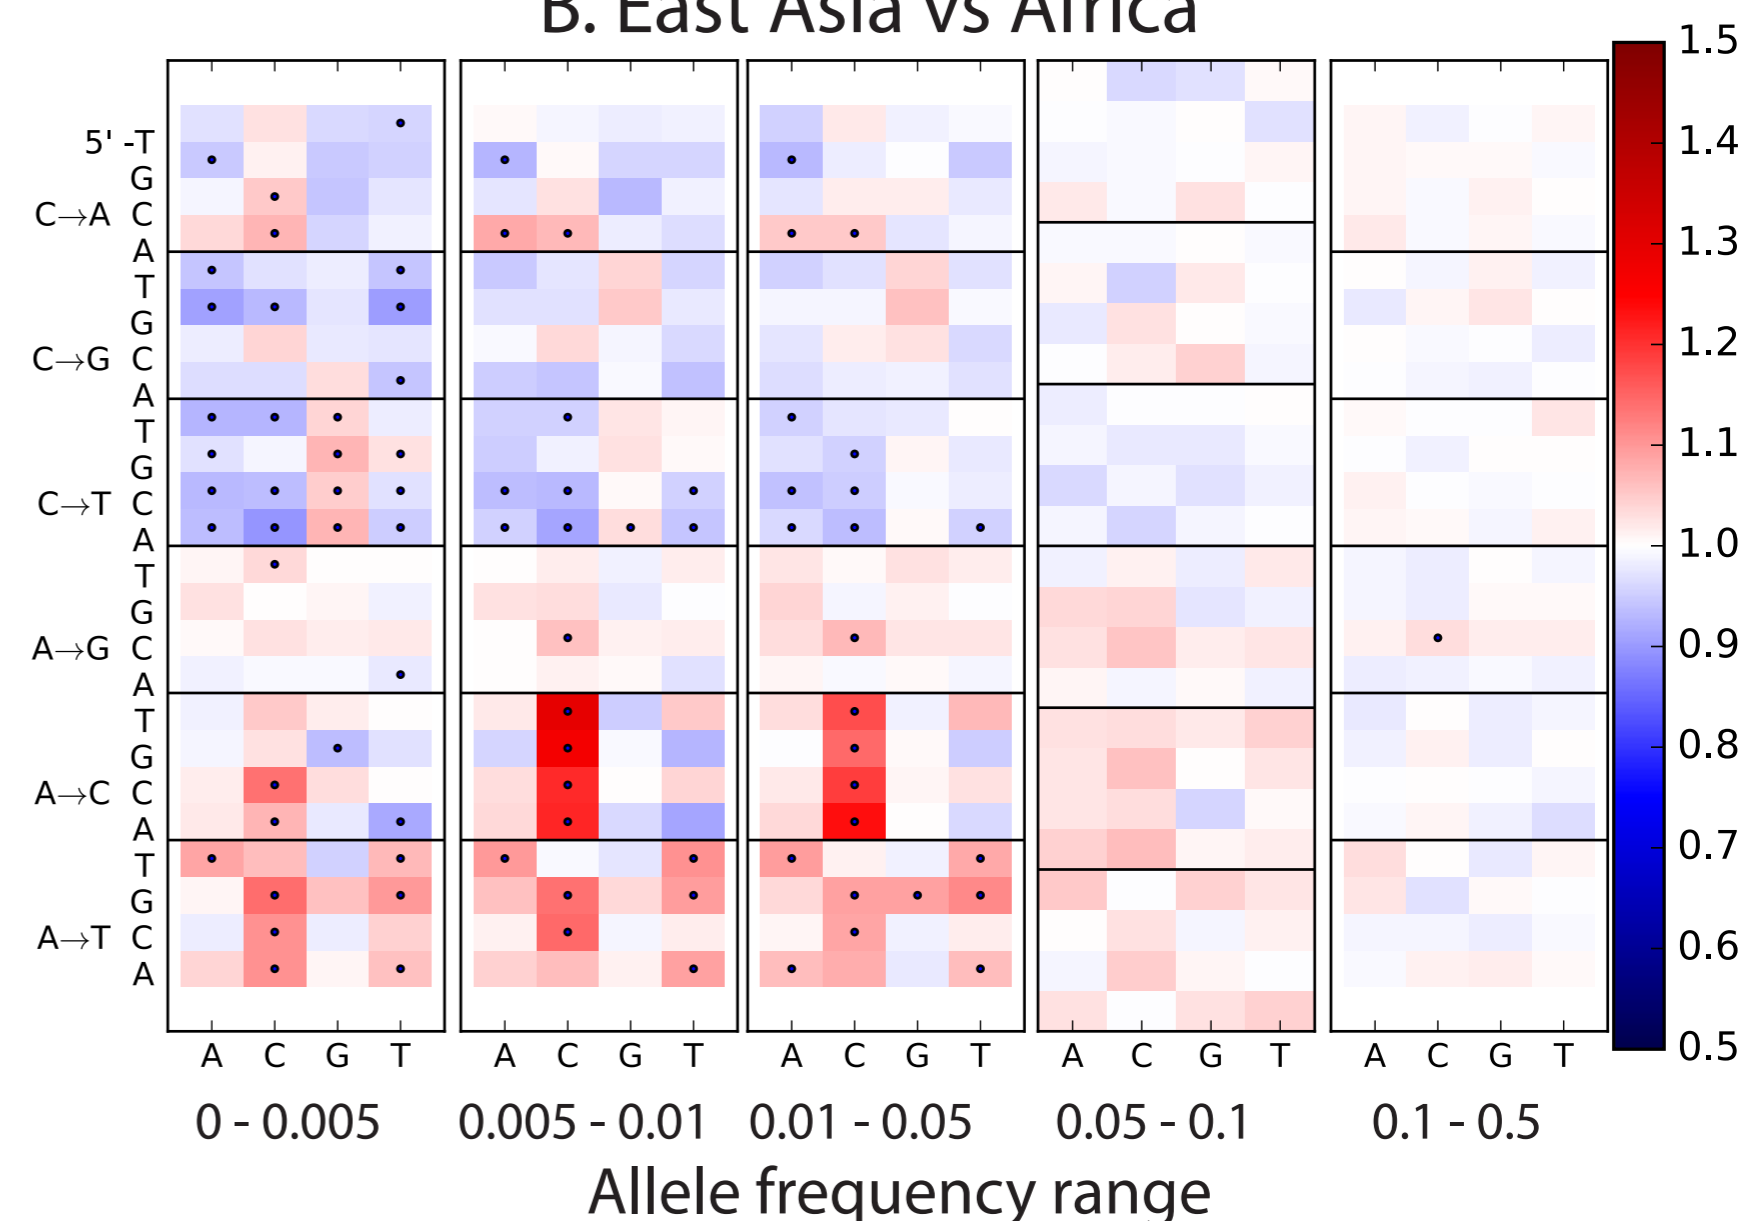

### C. Europe vs East Asia

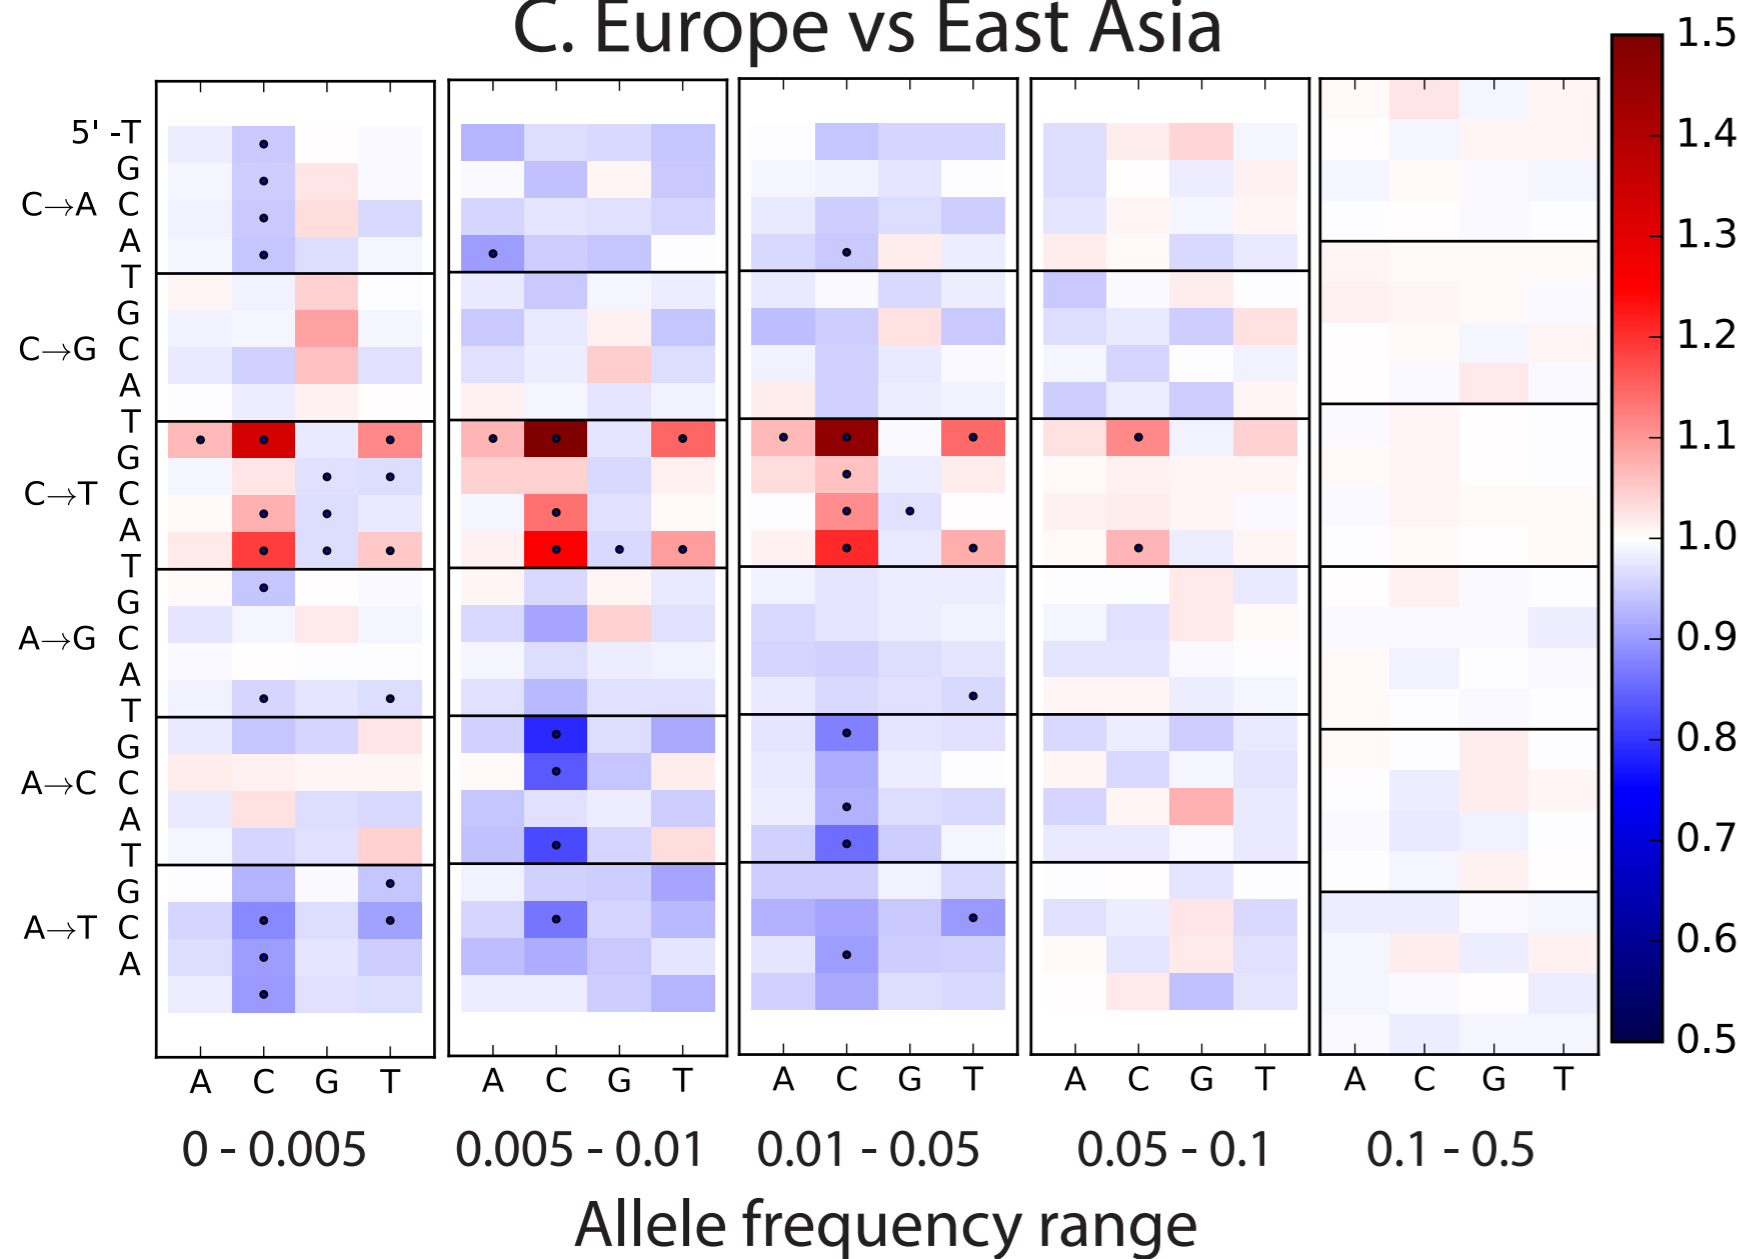

### D. South Asia vs East Asia

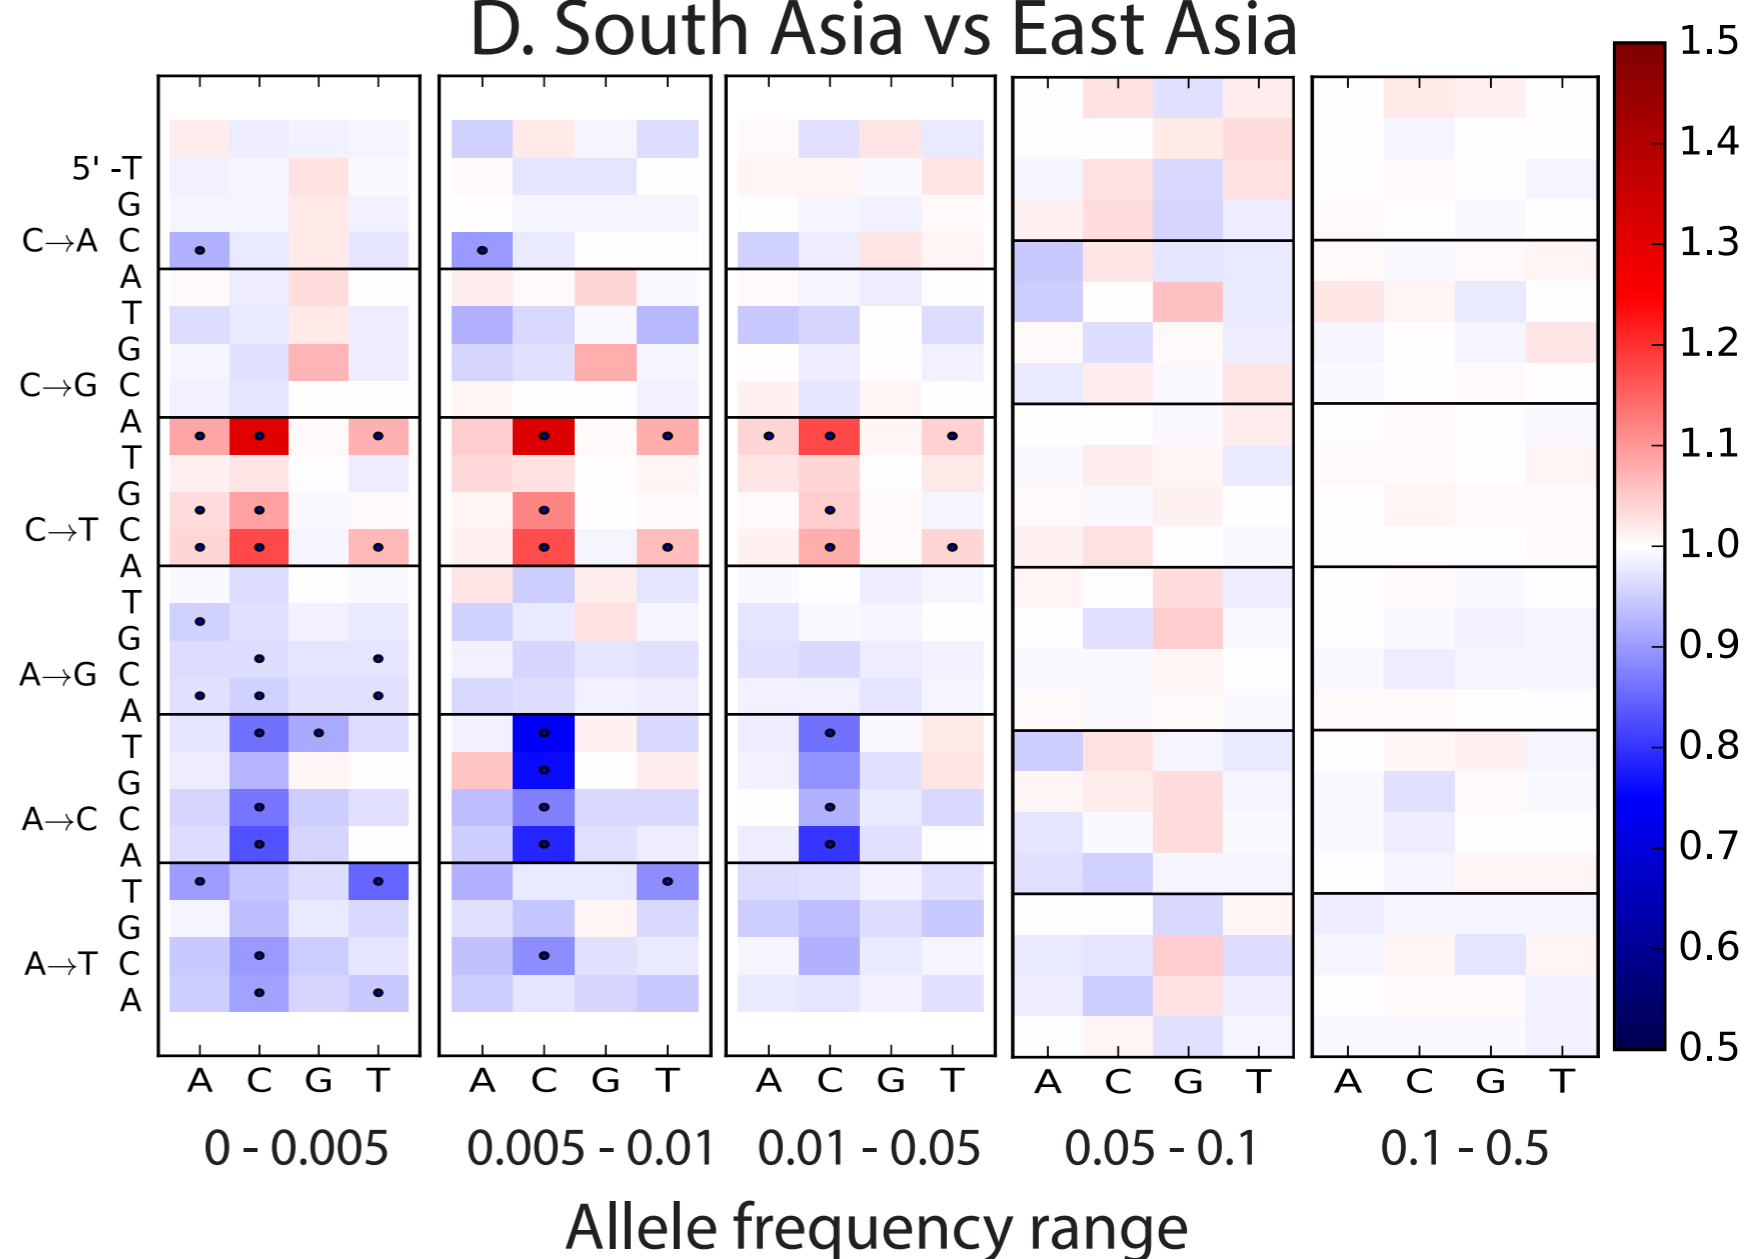

Supplement: supp [file elife-24284-supp-v1.zip › elife_poa_e24284_Figure_3_Figure_Supplement_6.pdf]

A. European Mutation PCA

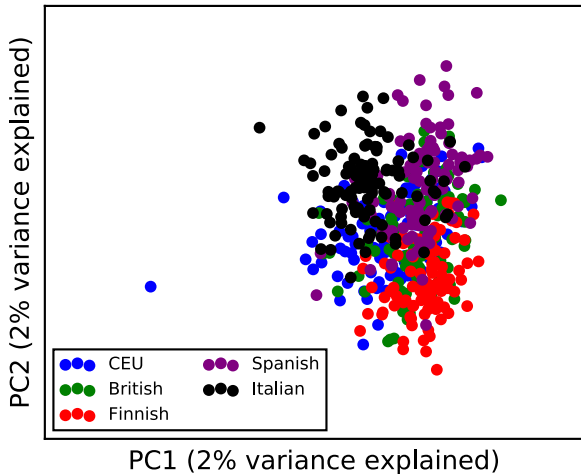

B. PC1 Loading

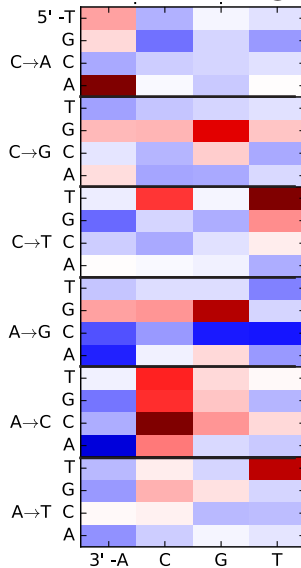

C. PC2 Loading

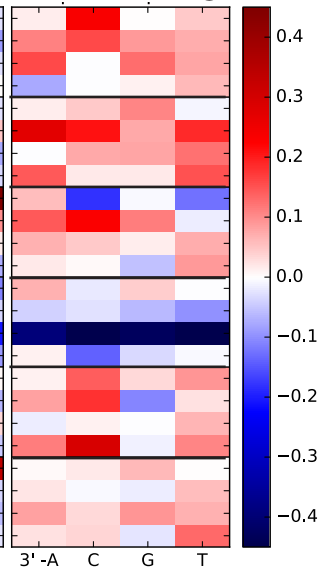

Supplement: supp [file elife-24284-supp-v1.zip › elife_poa_e24284_Figure_4_Figure_Supplement_6.pdf]

A. African Mutation PCA

PC2 (2% variance explained)

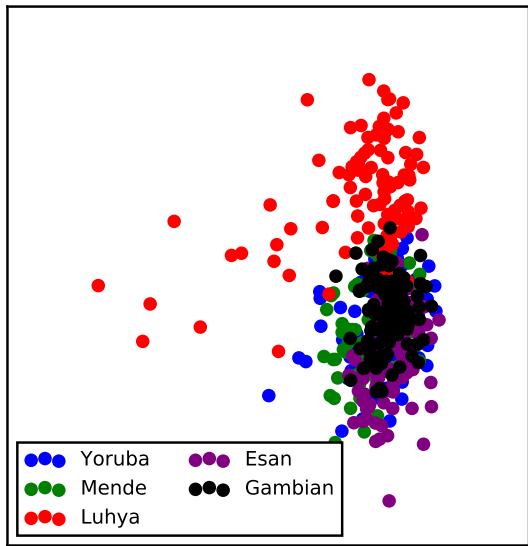

PC1 (3% variance explained)

B. PC1 Loading

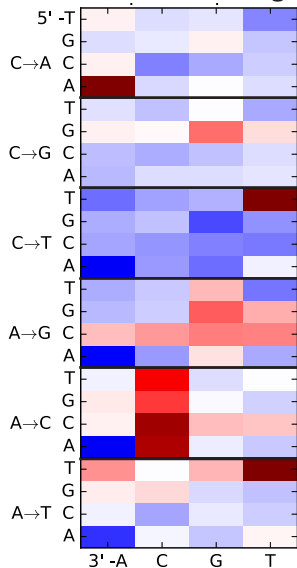

C. PC2 Loading

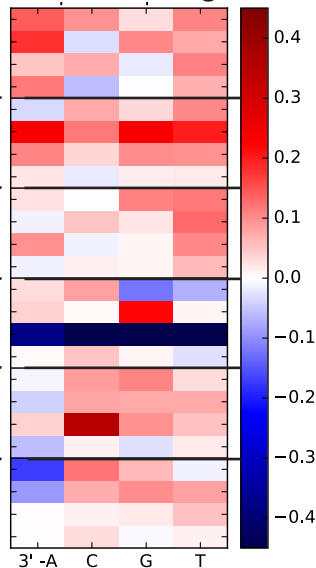

Supplement: supp [file elife-24284-supp-v1.zip › elife_poa_e24284_Figure_4_Figure_Supplement_3.pdf]

# A. Europe vs Africa

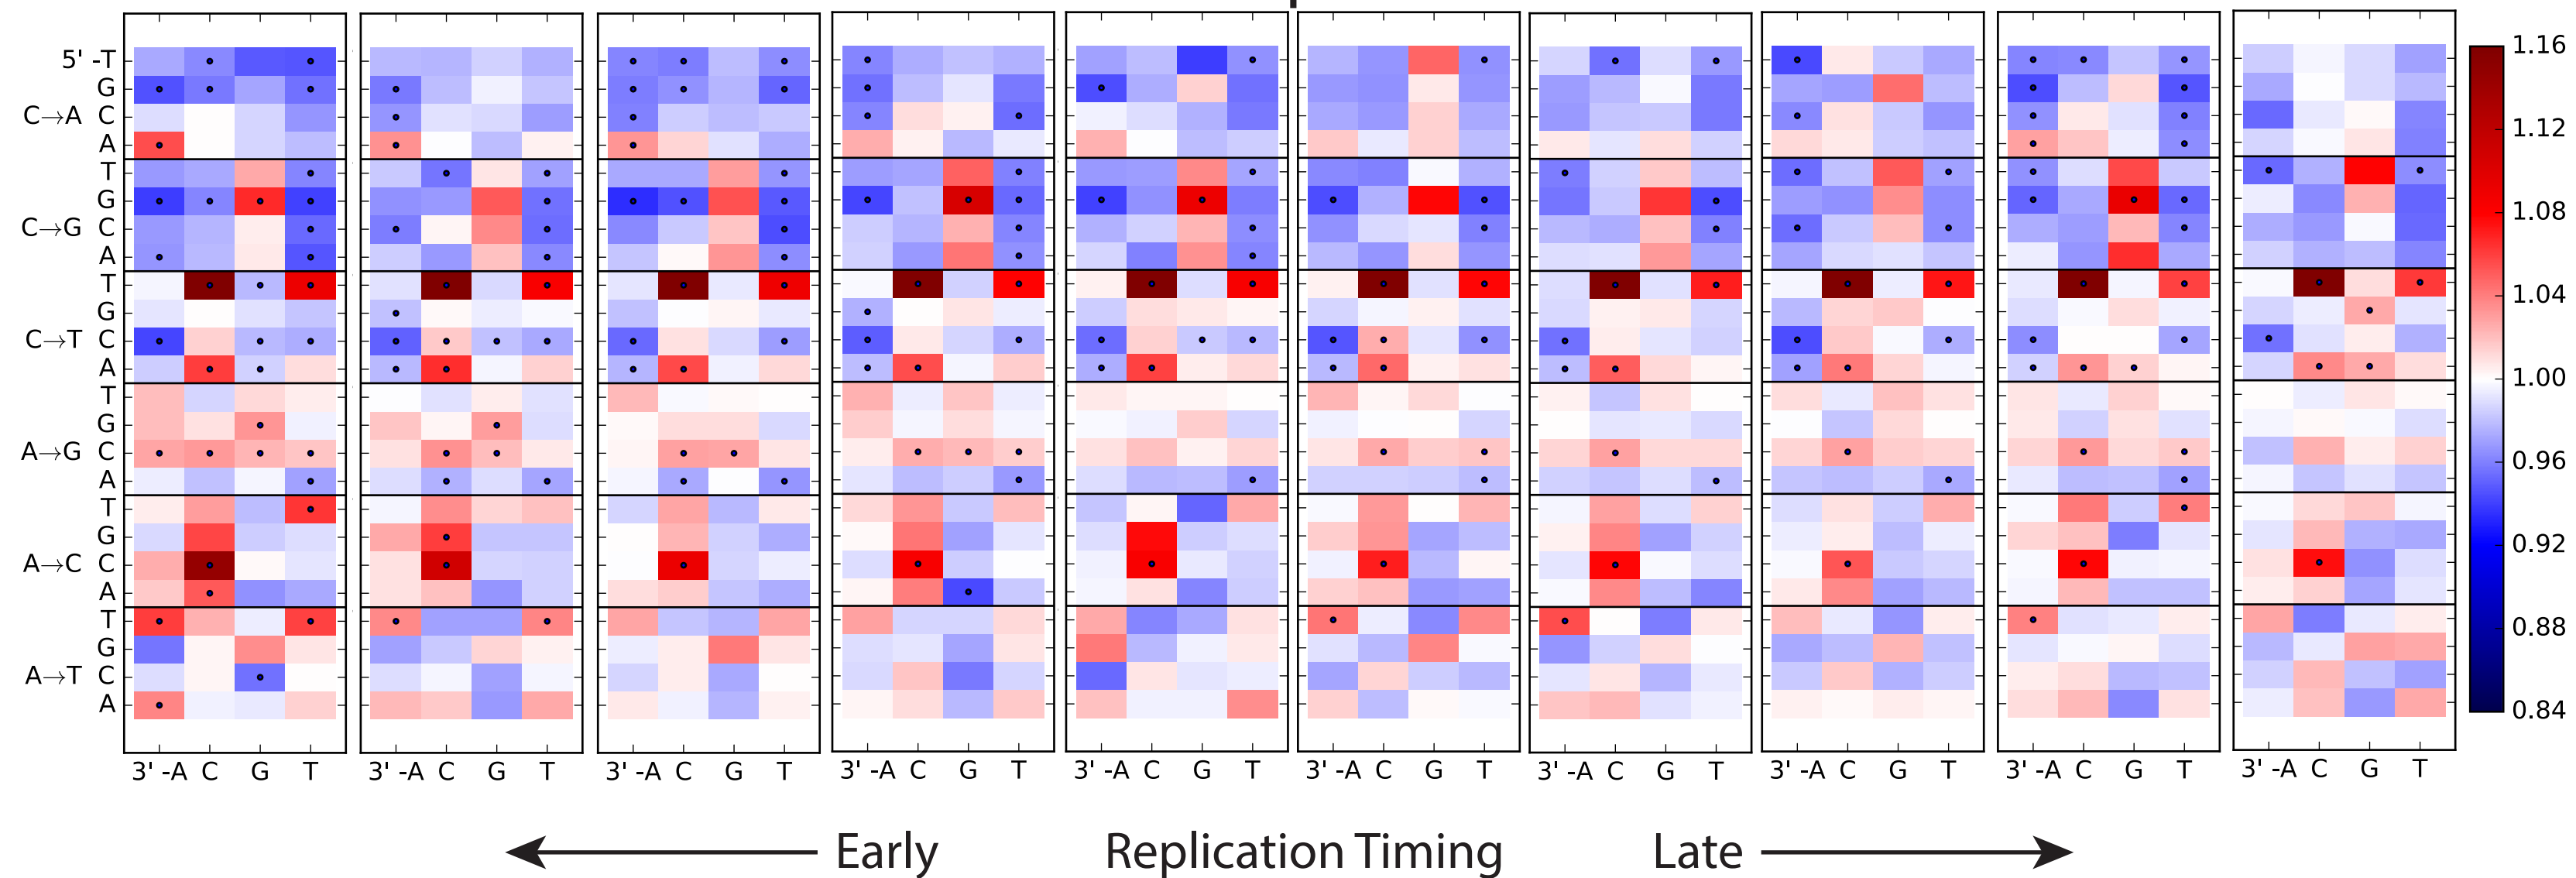

# B. East Asia vs Africa

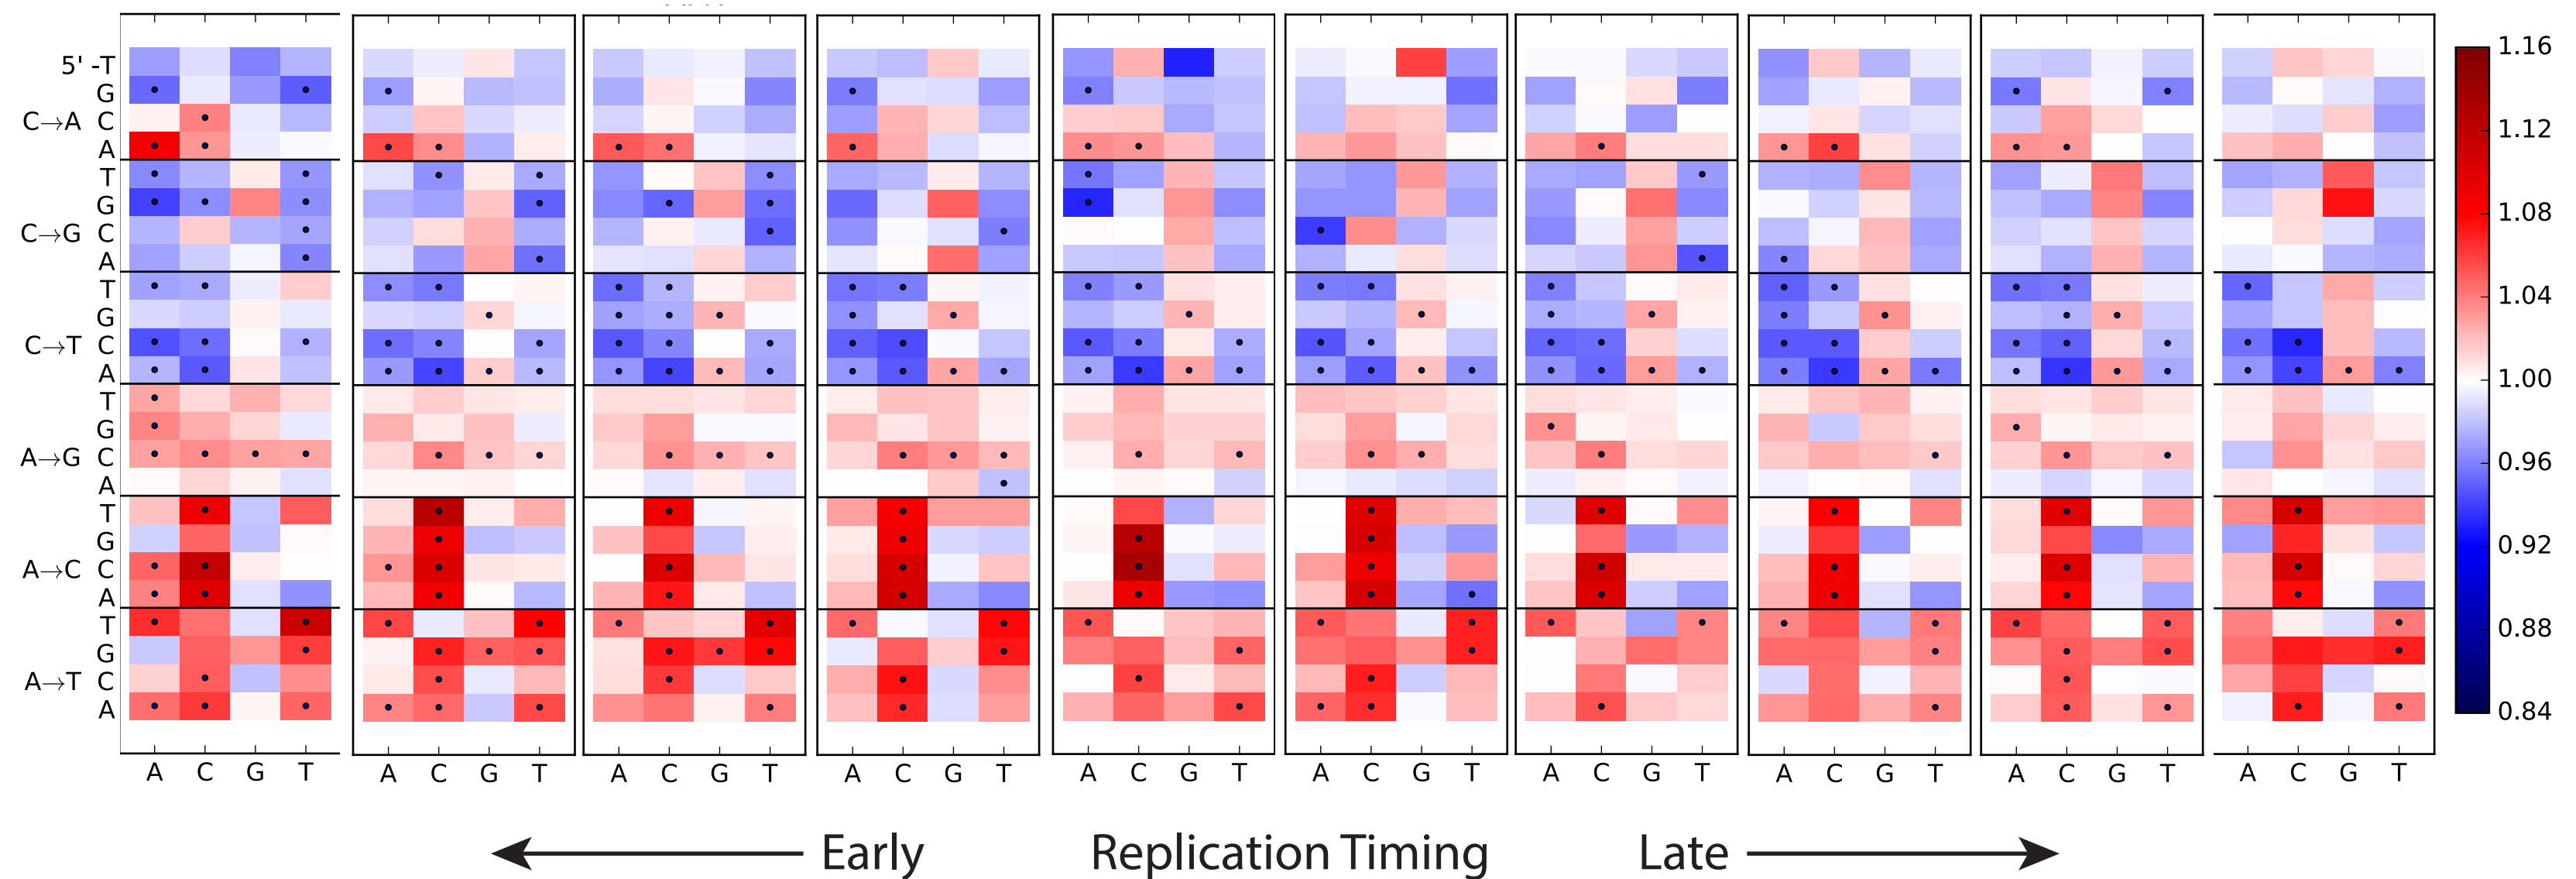

Supplement: supp [file elife-24284-supp-v1.zip › elife_poa_e24284_Figure_1_Figure_Supplement_8.pdf]

A. East Asian Mutation PCA

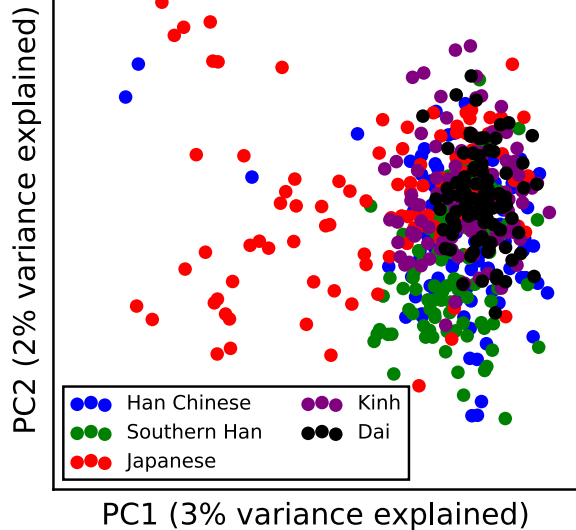

B. PC1 Loading

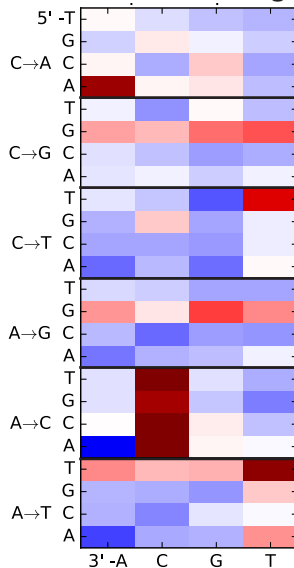

C. PC2 Loading

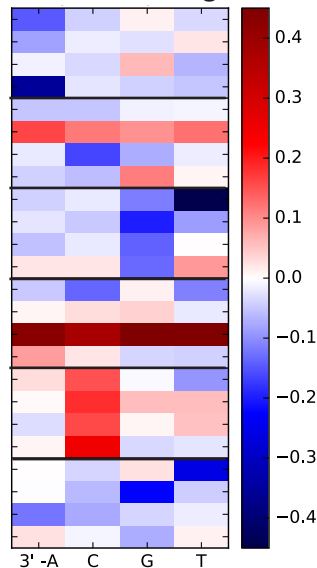

Supplement: supp [file elife_poa_e24284_Figure_4_Figure_Supplement_4.pdf › elife_poa_e24284_Figure_4_Figure_Supplement_4.pdf]
